# Supplementary material
Source: publisher figshare collection journal article supplement (https://frontiersin.figshare.com/ndownloader/files/31025035)
Supplement: Supplementary file 1 [file 31025035]

## Sheet: Body specific
Name	01.Body_I	02.Body_I	03.Body_I	04.Body_M	05.Body_M	06.Body_M	07.Body_YF	08.Body_YF	09.Body_YF	10.Body_MF	11.Body_MF	12.Body_MF	13.Eye_I	15.Eye_I	16.Eye_M	17.Eye_M	18.Eye_M	19.Eye_YF	20.Eye_YF	21.Eye_YF	22.Eye_MF	23.Eye_MF	24.Eye_MF	Swiss-Prot Annotation	Blastp Annotation
HIPPOLYTE_1-2-3_TRINITY_DN166412_c0_g1	355.859	665.949	885.149	611.428	598.073	564.243	814.284	894.297	873.195	645.497	818.861	366.322	4.69766	5.36081	0	0.788436	3.59556	5.47974	8.55364	0	0	2.46287	16.1782	Cytochrome b5-related protein;	Cytochrome b5-related protein;
HIPPOLYTE_1-2-3_TRINITY_DN168810_c0_g2	0	0	0	0	0	0	3.01789	0	88.6821	545.016	1192.96	729.734	0	0	0	0	0	0	0	0	0	0	9.6348
HIPPOLYTE_1-2-3_TRINITY_DN168825_c0_g1	302.037	404.505	432.63	152.533	302.44	296.863	460.754	350.627	617.86	286.735	318.815	319.097	2.63558	16.5849	0	9.00236	4.39829	0.592697	7.51889	8.8556	0	2.41815	3.91854
HIPPOLYTE_1-2-3_TRINITY_DN169373_c0_g1	824.697	1167.55	690.509	1774.35	1101.56	754.111	1370.42	1645.16	1286.24	449.508	444.19	344.344	4.56459	0.869225	4.72037	2.71603	2.06341	0	0	4.06423	0	4.18663	4.12207	Peritrophin-1;	Peritrophin-1;
HIPPOLYTE_1-2-3_TRINITY_DN169642_c0_g1	0.966477	1.09393	0	0	0	0	0.997131	0	52.026	763.368	1367	937.562	0	0	0	0	0	0	0	0	0	4.20693	5.4908
HIPPOLYTE_1-2-3_TRINITY_DN170123_c0_g1	0	0	0	0	0	2.03727	0	0	375.159	1904.22	4319.15	2438.19	1.6025	0.915773	0	0	0	0	0	0	0	13.2275	14.5028
HIPPOLYTE_1-2-3_TRINITY_DN170614_c0_g1	32.2394	50.4459	67.5439	176.461	166.353	181.269	67.3483	75.6177	112.29	423.936	554.102	498.507	2.96405	2.24876	1.0399	0	0	5.94327	10.2796	8.65654	7.1948	0	0
HIPPOLYTE_1-2-3_TRINITY_DN171794_c0_g1	0	2.18643	0	0	2.64309	1.94625	2.9939	0	58.8426	813.448	1227.09	496.978	0	1.74333	0	0	0	0	0	0	0	1.40054	6.86524	Elongin-C;	Elongin-C;
HIPPOLYTE_1-2-3_TRINITY_DN173127_c0_g1	0	3.76831	0	0	1.63351	0	0	0	23.0766	571.572	1143.03	795.673	0	0	0	0	0	0	0	0	0	2.59747	0	Carbonic anhydrase 2;	Carbonic anhydrase 2;
HIPPOLYTE_1-2-3_TRINITY_DN174075_c0_g1	0	3.36077	1.74754	0	1.86485	0.632482	5.83239	2.72466	441.516	1406.03	5140.27	2846.6	0	0	0.85252	0	2.97961	0	0.412155	0	1.74169	6.04898	25.3761		ATP-dependent RNA helicase glh-2;
HIPPOLYTE_1-2-3_TRINITY_DN174305_c0_g1	0	0	0	0	0	0	0	0	63.6838	1128.19	1306.49	898.084	0	0	0	0	0	0	0	0	0	5.53079	1.37658
HIPPOLYTE_1-2-3_TRINITY_DN174548_c0_g1	383.964	357.862	488.019	426.009	347.955	265.49	428.54	410.544	540.44	150.4	317.65	167.592	0	0.873069	0	0	1.02712	2.0777	0.6268	0	4.78332	8.42054	0	Organic solute transporter alpha-like protein 3;	Organic solute transporter alpha-like protein 3;
HIPPOLYTE_1-2-3_TRINITY_DN175041_c10_g1	341.553	448.355	586.896	68.6732	282.496	239.047	333.825	247.289	651.166	903.799	605.809	821.249	1.10836	0	0	0	0	0	0	0	0	7.83176	0		300 kDa antigen AG231;
HIPPOLYTE_1-2-3_TRINITY_DN175867_c5_g1	50.3775	70.5965	210.772	236.289	286.687	269.615	75.5172	135.583	39.3863	623.184	2148.18	1522	6.72555	25.8453	0	14.9746	0	4.83636	13.037	13.9086	28.7899	27.5708	4.05058
HIPPOLYTE_1-2-3_TRINITY_DN176648_c3_g1	793.671	1209.45	1519.12	598.29	802.152	875.444	1175.15	1017.31	1216.74	381.833	665.441	655.2	15.0252	0	5.24765	2.617	7.80598	1.20399	1.6569	1.43869	5.95087	19.8296	0	Peritrophin-1;	Chondroitin proteoglycan 2;
HIPPOLYTE_1-2-3_TRINITY_DN177021_c1_g1	0	0	0	0	0	0	0	0	3.21878	476.968	909.78	951.667	0	0	0	0	0	0	0	0	0	5.36652	2.7386
HIPPOLYTE_1-2-3_TRINITY_DN177162_c0_g1	0	6.54751	0	1315.88	2812.92	3283.37	0	1.04512	0	0	0	0	0	1.73865	0	2.71569	11.3474	0	0	0	1.20615	2.7915	5.49593
HIPPOLYTE_1-2-3_TRINITY_DN177373_c0_g1	1109.3	681.819	752.828	252.005	379.065	330.601	802.802	567.992	677.942	270.58	314.847	424.431	4.68099	16.9281	0	0	0	0.713341	21.2663	0.82946	0	0	0
HIPPOLYTE_1-2-3_TRINITY_DN177989_c1_g1	347.923	421.833	418.768	391.525	483.53	494.576	445.798	376.723	596.403	230.202	263.568	209.08	0	0.874635	0	0	0	0	0	0	0	4.21994	1.37184	Proton channel OtopLc ;	Proton channel OtopLc ;
HIPPOLYTE_1-2-3_TRINITY_DN178351_c6_g1	273.7	898.035	827.581	413.706	833.131	634.354	910.473	648.779	768.194	429.986	633.025	604.749	0	0	0	1.25552	0	0	0	2.49407	0.571158	0	0
HIPPOLYTE_1-2-3_TRINITY_DN178734_c1_g2	152.676	205.37	120.014	252.396	245.099	273.023	169.238	129.109	353.85	435.719	412.578	385.673	8.05934	15.1659	0	14.9579	7.44307	0.769173	6.10452	9.19199	5.11831	2.69823	8.29532
HIPPOLYTE_1-2-3_TRINITY_DN182408_c10_g1	279.028	420.915	482.887	405.229	540.948	513.903	472.997	540.323	844.122	713.36	980.543	606.53	3.05384	20.0502	1.18449	3.60995	15.4304	0.695964	13.8399	15.399	5.99726	2.80143	12.3571
HIPPOLYTE_1-2-3_TRINITY_DN182702_c5_g2	292.982	596.651	676.119	439.183	637.866	710.095	654.729	690.182	1128.4	832.099	1228.74	741.6	3.06107	20.9632	7.1246	2.70264	11.2971	4.15239	13.7827	21.0375	3.58612	5.61668	4.11786	Estradiol 17-beta-dehydrogenase 8;	Estradiol 17-beta-dehydrogenase 8;
HIPPOLYTE_1-2-3_TRINITY_DN182854_c1_g1	244.171	430.935	429.958	75.0802	307.932	341.987	384.56	433.703	882.072	642.343	222.502	288.254	5.36636	3.34671	0	23.8766	4.47657	6.98512	4.70957	3.63907	3.84782	5.32795	0
HIPPOLYTE_1-2-3_TRINITY_DN184159_c2_g2	204.127	335.31	332.002	450.176	274.511	353.401	317.704	398.209	441.123	173.259	185.133	233.204	5.59379	7.67584	0	0	0	3.88812	25.0085	4.49055	6.43153	0	0	Actin-2;
HIPPOLYTE_1-2-3_TRINITY_DN185531_c0_g1	34.1149	882.987	91.0594	852.342	413.716	163.078	91.9384	123.628	106.776	1779.16	438.689	316.807	0.262661	0.306587	1.41195	0	0	0	1.30833	0	0	0	4.12225
HIPPOLYTE_1-2-3_TRINITY_DN185846_c6_g1	202.499	273.123	270.646	259.307	259.927	311.789	294.649	269.325	593.264	358.649	303.08	361.497	8.3868	29.6069	2.36564	10.8428	10.2984	2.79379	11.3536	12.1707	7.21254	0	1.3734
HIPPOLYTE_1-2-3_TRINITY_DN186146_c0_g1	2.40459	0	0	1.64612	2.20242	0	0	0	119.571	760.861	1883.08	1418.24	0	0	0	0	0	0	0	0	0.753976	7.53064	5.15105
HIPPOLYTE_1-2-3_TRINITY_DN186260_c1_g1	0	22.7256	0	427.065	1008.32	1140.93	6.00025	0	0	11.0129	15.2039	5.10987	0	0	0	0.906344	0	0	0.638747	0	1.21378	0	0
HIPPOLYTE_1-2-3_TRINITY_DN186941_c2_g5	514.869	960.808	1400.25	759.853	1124.53	1152.19	1146.38	1044.63	1484.44	1229.01	998.08	582.251	7.87878	3.31509	0	0	0	0	4.18958	0.846395	0	7.99061	6.91046	Actin-1;	Actin-1;
HIPPOLYTE_1-2-3_TRINITY_DN187301_c1_g2	303.395	372.512	376.827	507.036	246.694	206.838	493.816	398.634	533.026	210.127	223.304	336.115	12.9697	18.6777	10.3671	2.8996	4.61412	11.8863	18.2379	25.1529	5.75612	0	0	Actin;
HIPPOLYTE_1-2-3_TRINITY_DN188552_c6_g1	217.111	247.636	281.678	84.0828	199.928	370.259	314.423	223.73	628	453.795	549.617	364.094	0.766635	23.6172	0	0	1.02516	2.06513	21.2149	10.4997	4.76536	2.81361	12.3462	Venom carboxylesterase-6;	Venom carboxylesterase-6;
HIPPOLYTE_1-2-3_TRINITY_DN188611_c4_g1	444.007	332.048	270.757	169.466	253.648	370.387	327.306	315.263	623.421	299.196	317.98	375.021	29.9055	19.2472	7.13975	5.39376	5.12486	4.81578	13.7212	20.1879	11.909	28.1427	6.85869	Nose resistant to fluoxetine protein 6;	Nose resistant to fluoxetine protein 6;
HIPPOLYTE_1-2-3_TRINITY_DN188753_c1_g1	964.543	1885.61	1446.48	263.324	1028.55	1131.51	2057.78	1574.37	1664.39	1138.75	1388.72	487.984	0.627226	0.358182	0	0	0.423602	0	7.01203	0	0	1.10727	0.564919
HIPPOLYTE_1-2-3_TRINITY_DN188922_c0_g2	697.9	910.909	783.458	604.574	827.402	655.059	770.455	736.304	989.491	993.4	723.928	512.149	14.487	20.0073	8.28275	8.04066	9.16793	1.36678	9.29481	13.6432	2.3666	22.3872	6.81761	Innexin inx2;	Innexin inx2;
HIPPOLYTE_1-2-3_TRINITY_DN190058_c6_g2	309.919	291.905	271.236	147.357	62.5527	95.3812	336.291	355.699	842.997	29.6779	68.4369	66.3833	25.9572	11.3326	0	0	2.05742	16.0079	20.7606	22.6935	0	0	0	Actin, larval muscle;	Actin, larval muscle;
HIPPOLYTE_1-2-3_TRINITY_DN190665_c6_g1	395.202	602.919	531.221	333.066	598.291	566.881	714.355	445.849	659.048	560.13	621.383	431.639	12.956	23.5033	0	11.7508	14.4226	2.09766	6.94401	5.68161	13.232	4.19442	6.86757
HIPPOLYTE_1-2-3_TRINITY_DN191167_c1_g1	3.2765	5.60369	1.37619	553.099	1033.49	1288.01	0	1.44461	0	1.24283	0	0.85381	11.1864	2.72075	0	5.10189	0	0	4.97736	2.74907	2.71171	0	0	Neurocan core protein;	Neurocan core protein;
HIPPOLYTE_1-2-3_TRINITY_DN191731_c2_g3	0.869169	115.43	0	14404.9	10577.8	12635.5	0	6.63488	4.10904	251.842	419.872	224.323	0	1.12466	10.6703	0	5.41204	0.640722	0	0.737659	7.68067	3.78041	1.79288
HIPPOLYTE_1-2-3_TRINITY_DN192295_c5_g1	0	1.09403	0	0	0	0	2.99105	3.12703	81.4261	1190.5	2376.48	1620.88	0	0	0	0	0	0	1.88259	0	0	2.80511	6.86326
HIPPOLYTE_1-2-3_TRINITY_DN192672_c4_g1	4.88078	23.0779	18.5131	52.8665	53.8531	56.0464	37.8797	30.786	249.883	681.904	808.718	698.578	0	0	0	0.904088	3.09259	1.38221	3.76085	4.87292	0	2.83396	0	Piwi-like protein Siwi ;	Piwi-like protein Siwi ;
HIPPOLYTE_1-2-3_TRINITY_DN192737_c1_g2	526.149	751.832	809.444	337.098	447.603	256.279	612.204	315.808	840.684	853.51	1260.57	1050.31	0	0.48533	0	0	0	0	0	0	0	7.77894	11.8188
HIPPOLYTE_1-2-3_TRINITY_DN192870_c0_g2	0	0	0	0	0.880878	0	5.97834	1.0418	46.3495	631.112	1921.5	1030.72	0	0	0	0	3.08058	0	0	3.23606	0	2.80776	15.0963
HIPPOLYTE_1-2-3_TRINITY_DN192894_c5_g1	99.9412	49.1261	11.4837	381.952	474.425	366.814	103.77	135.102	34.2809	173.78	10.652	0	2.60847	2.15219	6.81451	6.73866	0	2.22966	0	0.940281	0	0	0
HIPPOLYTE_1-2-3_TRINITY_DN193758_c3_g5	0	4.29587	1.15574	953.063	970.135	1549.28	3.06015	0	0	0	0	0	0	0	0	0	0	0	0	0	0	0	0
HIPPOLYTE_1-2-3_TRINITY_DN194084_c0_g1	254.606	705.536	968.517	546.976	887.008	1027.07	1128.71	1054.85	1461.13	487.907	693.775	606.731	0	0.692114	0	0	1.08902	0	0	0	0	10.4809	16.0228	Carbonic anhydrase 2;	Carbonic anhydrase 2;
HIPPOLYTE_1-2-3_TRINITY_DN194410_c1_g1	106.632	160.276	69.8572	399.775	325.395	407.369	81.0362	134.164	88.2999	703.256	293.844	97.9706	12.4131	17.7504	14.9373	7.84936	14.9137	7.76623	23.2123	17.233	25.4641	8.1525	2.82322		Interferon alpha-inducible protein 27, mitochondrial ;
HIPPOLYTE_1-2-3_TRINITY_DN195055_c0_g1	0	11.7235	0	1466.28	2822.27	3738.1	0	0	0	0	0	0	0	0	0	0	0	0	0	0	0	0	0
HIPPOLYTE_1-2-3_TRINITY_DN195086_c3_g3	284.188	254.407	324.708	522.747	345.42	390.815	316.85	348.867	320.55	356.694	308.843	297.501	12.948	23.4914	10.6338	9.04405	1.03072	5.603	20.8576	3.24831	27.6951	0	1.37369
HIPPOLYTE_1-2-3_TRINITY_DN195159_c9_g1	0	0	0	0	0	0	6.36076	0	101.324	582.915	1235.48	899.516	0	0	0	0	0	0	0	0	0	0	3.37128
HIPPOLYTE_1-2-3_TRINITY_DN195190_c7_g1	144.421	340.779	317.21	194.439	307.377	298.768	375.11	286.162	534.245	427.479	395.966	368.706	0	6.12314	0	2.69735	6.15083	0.688322	2.49572	0.807647	1.19128	2.8137	17.8333	Serine/threonine-protein kinase PAK 1 ;	Serine/threonine-protein kinase PAK 1 ;
HIPPOLYTE_1-2-3_TRINITY_DN195308_c6_g1	237.245	331.653	271.642	333.317	360.22	372.226	364.56	272.057	334.267	637.392	565.501	430.671	14.1054	21.9404	0.77136	4.51609	3.38386	4.95526	6.75867	4.47945	8.3795	1.82444	3.60115
HIPPOLYTE_1-2-3_TRINITY_DN195657_c2_g5	1.05644	1.01078	0	1187.02	1366.98	1689.18	0	0	0	11.6124	0	3.56028	0.703762	0	0	0	0	0.657093	0	0	0	0	0
HIPPOLYTE_1-2-3_TRINITY_DN195657_c2_g6	0	7.42471	0	871.911	1206.18	1485.57	0	0	0	0	1.15617	0	0	0	0	0	1.07697	0	0	0	0	0	0
HIPPOLYTE_1-2-3_TRINITY_DN195820_c0_g1	341.487	464.419	425.324	290.821	343.922	525.331	463.284	326.269	1241.7	367.764	707.119	335.843	10.7183	25.9054	0	5.44272	17.5823	2.77837	14.9563	13.716	14.4239	4.25712	15.2228	Probable 4-coumarate--CoA ligase 3;	Probable 4-coumarate--CoA ligase 3;
HIPPOLYTE_1-2-3_TRINITY_DN196055_c0_g1	4.84969	5.48093	8.58371	5.25377	0.880683	17.6522	7.9558	5.20072	390.675	732.927	4880.72	3235.83	2.30167	3.50105	10.7157	0.898522	25.6127	0.686987	0	2.42144	1.18984	0	24.6884	Chorion peroxidase;	Chorion peroxidase;
HIPPOLYTE_1-2-3_TRINITY_DN197783_c1_g4	2.05857	45.2482	2.57147	6890.72	9488.58	11369.7	5.42523	2.26506	0	1.19483	3.79792	2.35827	4.06646	0	3.78333	0	1.12053	1.5509	0.695018	0	0	0	0
HIPPOLYTE_1-2-3_TRINITY_DN197960_c0_g2	331.978	231.625	180.754	518.768	245.09	367.259	254.154	234.939	221.531	525.479	398.387	400.776	6.04828	3.4589	4.68968	0	3.11115	0.714405	0.641394	6.53618	3.65678	5.54629	0	Actin, alpha cardiac muscle 1;
HIPPOLYTE_1-2-3_TRINITY_DN198222_c0_g2	1137.59	1260.33	1528.08	485.852	753.223	572.921	1107.7	1013.88	1379.56	3251.74	2260.09	1574.05	2.22925	0	0	0	0	0.789933	1.5086	0	0	20.3915	12.2303
HIPPOLYTE_1-2-3_TRINITY_DN198311_c3_g1	440.381	721.501	835.746	622.974	714.95	748.832	899.108	716.498	1349.94	819.36	682.176	590.175	4.08069	28.0472	5.27671	5.59755	11.8514	0.6136	16.5223	17.3151	15.9081	2.49593	9.75138
HIPPOLYTE_1-2-3_TRINITY_DN198622_c0_g1	735.5	380.691	388.719	139.409	210.547	163.792	412.808	303.348	497.636	151.573	254.987	161.186	6.87875	5.23523	7.11523	0	1.02776	4.16358	3.13859	4.85835	1.19729	11.2187	0
HIPPOLYTE_1-2-3_TRINITY_DN198680_c0_g2	23.8273	21.6995	388.884	374.088	437.379	481.281	85.621	51.5079	112.637	635.561	364.876	336.706	0.753015	8.61763	0	0	8.32426	0.722269	0	4.91815	4.90865	5.52347	1.37693
HIPPOLYTE_1-2-3_TRINITY_DN200857_c6_g1	29.7381	91.5204	126.575	311.404	277.597	356.139	10.1404	133.079	31.5741	337.798	1969.24	372.358	6.96422	13.6874	10.5386	3.40192	9.52596	6.52833	14.9002	7.51935	3.21865	21.986	17.9315
HIPPOLYTE_1-2-3_TRINITY_DN200995_c2_g1	121.622	24.0488	4017.02	435.529	523.338	943.716	874.309	1110.02	1273.12	312.219	13131.4	565.367	0	4.35779	3.55248	0	0	1.39292	0	1.62131	0	1.40032	0	Endocuticle structural glycoprotein SgAbd-1;	Endocuticle structural glycoprotein SgAbd-1;
HIPPOLYTE_1-2-3_TRINITY_DN202217_c0_g1	623.316	712.748	652.654	550.895	529.862	495.601	749.932	682.924	1058.47	483.239	435.942	360.834	7.31823	27.6533	0	4.76913	14.4977	1.83395	16.397	19.2747	7.38642	0	1.21053	Equistatin;	Equistatin;
HIPPOLYTE_1-2-3_TRINITY_DN203551_c0_g2	0	0	1.90794	0	0	3.05229	0	0.579785	73.2671	460.627	2354.12	729.714	1.19503	0.488	0	0.500815	0	0	0.975217	3.87179	1.98931	0	4.58746
HIPPOLYTE_1-2-3_TRINITY_DN204104_c3_g1	326.166	905.772	695.541	326.195	692.168	657.113	948.438	675.059	1312.52	875.477	699.43	774.452	8.68097	10.0596	3.72144	4.68135	0	0	5.28632	11.7747	0	1.46687	4.28737	Integrin alpha-8;	Integrin alpha-8;
HIPPOLYTE_1-2-3_TRINITY_DN204548_c0_g1	161.927	319.493	393.537	343.328	208.387	196.125	294.882	315.447	408.989	442.196	300.04	326.386	23.5902	26.2696	3.71714	23.0542	11.2397	8.36847	8.80932	5.06013	13.076	1.0989	4.2936
HIPPOLYTE_1-2-3_TRINITY_DN204698_c4_g1	228.801	449.104	322.001	488.022	684.291	563.52	521.129	436.842	1465.23	775.667	814.346	683.433	10.9728	10.3694	0	10.0769	19.2436	4.51715	8.16442	24.2027	23.9429	7.44987	14.4873
HIPPOLYTE_1-2-3_TRINITY_DN205083_c5_g1	217.425	288.421	298.057	183.068	217.367	334.927	397.095	469.588	538.808	325.124	340.927	296.603	3.99293	18.5794	0	2.62475	20.7159	1.05235	17.6206	17.3986	1.99761	3.41808	0
HIPPOLYTE_1-2-3_TRINITY_DN205204_c0_g1	0	0	0	0	0	0	0	0	25.9089	422.306	732.123	688.417	0	0	0	0	0	0	0	0	0	0	0
HIPPOLYTE_1-2-3_TRINITY_DN205231_c1_g1	154.207	402.816	327.091	133.139	318.682	236.626	408.441	306.448	593.661	285.915	198.556	224.279	7.21337	2.74407	3.73102	0	0	0.723026	1.30963	13.5419	0	0	4.30919	Ankyrin-2 ;	Ankyrin-2 ;
HIPPOLYTE_1-2-3_TRINITY_DN205259_c0_g3	113.575	188.605	113.968	335.284	430.103	378.806	325.912	195.825	177.929	2.31179	245.827	327.422	3.80807	3.158	0	5.33524	0.722158	2.4798	0.891586	0	0	5.05996	3.83614
HIPPOLYTE_1-2-3_TRINITY_DN205344_c8_g1	7.23141	3.16129	14.0419	1887.49	12991.3	16331.4	5.17195	0	7.24127	299.095	151.246	165.887	5.29706	15.3466	10.0277	26.3875	7.60913	6.87195	1.96531	2.8234	0.079125	3.56074	7.62416
HIPPOLYTE_1-2-3_TRINITY_DN206052_c0_g3	208.626	305.372	346.629	320.113	411.137	408.62	352.204	279.327	347.899	511.168	503.03	307.667	8.15104	26.6733	0	2.47002	3.51867	6.35758	8.86672	6.3393	6.57842	2.195	14.1809
HIPPOLYTE_1-2-3_TRINITY_DN206057_c1_g1	1.90923	0	0	5.28437	1.76348	0	1.00617	0	48.8931	847.603	989.715	1056.51	0	0	9.35668	0	6.23437	0	0	0	0	6.91624	0
HIPPOLYTE_1-2-3_TRINITY_DN206057_c1_g3	0.623042	1.43263	0	3.58504	0	1.22935	0.688837	0	83.8244	611.907	926.946	668.788	0	0	0.763014	1.25602	1.4282	0	0	0	0	0	1.8541
HIPPOLYTE_1-2-3_TRINITY_DN206451_c4_g1	1341.62	1157.67	1339.67	325.316	435.463	339.984	1113.02	1133.37	1414.63	650.382	406.202	317.348	23.9916	6.51143	5.4638	2.1572	4.91836	2.02801	2.64809	3.87495	2.8631	4.78105	1.00877
HIPPOLYTE_1-2-3_TRINITY_DN207300_c3_g1	0	0	0	0	0	0	0	0	43.9123	699.948	811.302	425.341	0	0	0	0	0	0	0	0	0	0.631662	0
HIPPOLYTE_1-2-3_TRINITY_DN207607_c3_g1	138.905	362.251	429.678	250.794	451.809	433.747	481.369	492.862	528.986	456.027	594.17	189.817	13.6023	16.9936	0	0	8.64546	2.61726	4.68359	8.89729	0	10.5727	2.48886
HIPPOLYTE_1-2-3_TRINITY_DN207761_c1_g1	476.114	730.806	800.496	1319.64	1057.87	908.72	903.861	940.687	1353.9	1820.62	1095.57	1180.32	5.37588	21.3884	1.33733	0	4.72675	0.406624	0.365206	24.281	5.55324	2.37232	13.7201	Collectin-12;	Collectin-12;
HIPPOLYTE_1-2-3_TRINITY_DN208096_c4_g2	321.98	696.626	828.143	313.428	442.354	364.574	815.439	881.318	747.843	295.517	324.742	306.482	6.9203	7.89526	0	4.50533	0	6.89318	11.2501	6.47534	0	1.41103	0	Maltase-glucoamylase, intestinal;	Maltase-glucoamylase, intestinal;
HIPPOLYTE_1-2-3_TRINITY_DN208456_c3_g4	178.738	844.737	862.544	335.166	1202.04	976.942	1178.87	651.312	736.198	516.008	1163.01	729.225	0	0	0	0	1.23284	0	0	0	0	13.8902	0
HIPPOLYTE_1-2-3_TRINITY_DN208526_c2_g1	203.051	207.901	214.629	185.411	250.181	314.158	224.28	175.082	353.929	349.17	419.156	361.44	3.8233	15.7116	0	1.80245	3.08208	1.38616	3.76287	9.71295	5.98189	0	0	CD63 antigen;	Tetraspanin-11;
HIPPOLYTE_1-2-3_TRINITY_DN208537_c0_g1	0	0	0	2.6471	0	0.816681	1.80956	0	40.4528	558.14	851.836	812.682	0	0	0	0	0	0	0	0	0	0	4.98891	SET and MYND domain-containing protein 4;	SET and MYND domain-containing protein 4;
HIPPOLYTE_1-2-3_TRINITY_DN208621_c0_g1	0	0	0	447.857	670.198	400.736	0	0	0	0	0	0	0	0	0	0	0	0	0	0.91982	0	0	0
HIPPOLYTE_1-2-3_TRINITY_DN208770_c3_g1	326.614	546.266	592.529	290.285	649.7	630.218	749.774	656.137	692.663	374.721	456.206	406.588	0	3.46242	0	0	0	0.712025	1.27963	5.71333	0	0	0
HIPPOLYTE_1-2-3_TRINITY_DN208868_c0_g1	0	0	0	0	0	0	5.70649	0	47.2024	1532.26	1646.69	1693.68	0	0	0	0	0	0	0	0	0	1.90236	0
HIPPOLYTE_1-2-3_TRINITY_DN208930_c3_g1	6.60401	415.151	0.594313	63344.1	97870.1	107501	56.8534	1.01911	46.707	8.87667	27.2964	5.52965	1.86505	0	0.578719	0.440853	27.5712	0.679821	0	16.3634	2.92937	1.36872	19.6276	Hi-UCM
HIPPOLYTE_1-2-3_TRINITY_DN208930_c3_g2	0	37.708	1.80179	2466.05	4204.88	4833.65	2.39554	0	0	0	0	0	0	0	0	0	0	0	0	0	0	0	0
HIPPOLYTE_1-2-3_TRINITY_DN209003_c2_g1	1.06276	6.003	0	584.353	1200.48	1657.13	2.66477	0	0	24.0957	12.6605	10.0353	0.840568	0	3.18554	3.21077	0	0.756349	0	2.16308	2.61644	0	0	Cytochrome P450 2L1;	Cytochrome P450 2L1;
HIPPOLYTE_1-2-3_TRINITY_DN209196_c0_g1	2.07156	0.601747	1.5063	583.075	2150.03	1565.7	6.11028	1.24979	0	0	0	1.07708	0	0	0	0	0	0	0.406175	0	0	0	0
HIPPOLYTE_1-2-3_TRINITY_DN209196_c0_g3	6.36659	6.20331	6.71006	1279.09	3063.52	3551.47	1.9509	7.95387	5.02018	0.699552	3.36134	2.68462	0	1.08403	0	0	0	0	14.7759	1.03421	0	0	0
HIPPOLYTE_1-2-3_TRINITY_DN209196_c0_g4	7.52008	5.38003	4.64637	784.218	1598.46	1949.95	4.07059	5.30033	2.28793	3.35855	2.33287	4.86797	0.741492	4.25314	0	0	0	0	0	0	0	0	0
HIPPOLYTE_1-2-3_TRINITY_DN209407_c6_g2	182.903	420.141	492.76	408.663	599.189	585.472	456.353	389.959	521.4	631.816	593.362	378.5	0	0	0	0.95055	1.08078	0	0	0.847578	0	11.969	15.198	Actin;	Actin;
HIPPOLYTE_1-2-3_TRINITY_DN209433_c3_g1	0	0	0	0	0	0	3.98557	0	82.5249	1475.16	2019.52	1795.78	0	0	2.37436	0	0	0	0	0	0	0	20.5858
HIPPOLYTE_1-2-3_TRINITY_DN209557_c0_g2	1.4932	1.32159	1.41392	0	0.54616	0	3.52291	0.658268	27.3917	366.426	583.984	520.197	0	0	0	0	0	0	0	0	0	2.18691	2.28693
HIPPOLYTE_1-2-3_TRINITY_DN209927_c3_g1	0	2.18909	2.44122	7.8883	9.68968	11.7178	30.8888	19.7946	50.8721	709.055	1261.3	786.254	0	2.6198	0	0	0	0	0.626456	0	0	1.40383	1.3724	Venom serine protease;	Venom serine protease;
HIPPOLYTE_1-2-3_TRINITY_DN210045_c3_g1	0	0	0	0	0	0	2.98554	0	24.8516	818.937	1427.68	652.932	0	0	0	0	0	0	0	0	0	0	2.74375
HIPPOLYTE_1-2-3_TRINITY_DN210243_c2_g1	114.159	317.203	397.721	82.0541	376.051	524.301	445.314	431.687	431.472	160.155	343.621	189.868	0	0	0	0	0	0	0	0	0	14.2847	3.7145
HIPPOLYTE_1-2-3_TRINITY_DN210913_c1_g1	147.796	282.967	285.859	349.963	374.333	370.468	359.67	278.544	336.608	258.386	486.159	361.377	0	0	0	0.788637	2.23277	0	0	0	0	19.3182	1.79069
HIPPOLYTE_1-2-3_TRINITY_DN211120_c1_g1	0	19.6819	0	2160.15	2794.55	2937.63	4.98852	1.04294	1.1314	4.39591	12.9809	0	0	2.61581	0	1.80455	7.19931	2.08644	0	0.810296	3.59682	2.80219	0
HIPPOLYTE_1-2-3_TRINITY_DN211390_c1_g1	131.666	636.785	497.4	450.835	286.914	278.251	557.066	349.992	396.479	277.637	342.975	223.747	11.261	9.14036	0	4.99813	0	0.602033	2.09751	4.95896	0	6.3209	7.10713
HIPPOLYTE_1-2-3_TRINITY_DN211390_c1_g3	285.177	1194.59	802.615	1052.4	538.461	487.281	993.594	706.395	824.497	899.947	641.306	456.084	24.2652	16.3052	3.96091	14.976	1.79431	6.96086	0	21.2893	6.39545	4.68522	8.26232
HIPPOLYTE_1-2-3_TRINITY_DN211420_c1_g1	1899.33	1607.98	1551.1	1320.5	1717.33	1503.13	1386.43	1397.04	1472.22	862.001	1044	1105.48	3.38825	12.2377	0	0	3.86435	1.65708	22.6003	10.981	23.5508	5.31645	5.17532	Homeobox protein abdominal-A homolog;	Homeobox protein abdominal-A;
HIPPOLYTE_1-2-3_TRINITY_DN211884_c2_g1	338.604	495.796	410.83	225.901	265.48	265.41	435.238	496.441	308.885	115.462	105.771	60.4385	0	0	0	0	0	0	0	0	0	0	0
HIPPOLYTE_1-2-3_TRINITY_DN212110_c3_g1	0	6.31707	0	518.046	797.448	784.481	0	0	0	0	0	0	0	0	0	0	0	0	0	0	0	0	0
HIPPOLYTE_1-2-3_TRINITY_DN212422_c1_g2	401.81	281.999	282.101	396.132	428.78	402.816	444.663	361.519	700.407	172.484	338.626	336.226	0	0	0	0	0	0	0	1.74587	0	5.68715	1.99824
HIPPOLYTE_1-2-3_TRINITY_DN212422_c1_g4	1599.15	1303.77	1083.7	1843.32	1986.61	1794.06	1910.25	1352.91	3185	789.461	1680.48	1360.2	0	0	0	0	1.67234	0	0	1.60858	2.96642	12.133	3.31255
HIPPOLYTE_1-2-3_TRINITY_DN212487_c8_g2	254.088	378.979	541.404	1097.92	516.158	407.816	455.065	428.181	231.494	611.962	991.706	496.527	11.3314	23.8212	1.08859	4.87731	3.34554	26.9546	21.5571	11.4313	19.4091	15.6035	6.74116	Myosin heavy chain, muscle;
HIPPOLYTE_1-2-3_TRINITY_DN212501_c3_g2	0	1.72992	0	916.486	2105.94	2423.37	0	0	0	0	0	0	0	0	2.03374	0	0	0	0	0	0	0	0	Enterin neuropeptides;
HIPPOLYTE_1-2-3_TRINITY_DN212501_c3_g4	0	2.0509	0	386.02	884.585	1259.49	0	0	0	0	0	0	0	0	0	0	0	0	0	0	0	0	0
HIPPOLYTE_1-2-3_TRINITY_DN212643_c0_g1	0	0.772215	2.58374	4.63735	8.07866	4.13392	3.51449	1.46988	75.7627	971.775	3350.61	1923.9	0	0	0	3.81252	0	0	0	0	0	1.98094	3.8727	Elongation factor 1-alpha, oocyte form;	Elongation factor 1-alpha, oocyte form;
HIPPOLYTE_1-2-3_TRINITY_DN212730_c0_g1	0	0	1.22546	483.412	1761.42	2559.04	0	0	0	1.09584	0	1.52827	0	0	0	0	0	0	1.87049	1.61482	0	0	0
HIPPOLYTE_1-2-3_TRINITY_DN212856_c2_g1	3.50924	142.978	0.605058	15168.7	27383.4	28695.3	3.27069	11.9981	0	0	0	0	0	0	1.29106	0	0	0.194663	0	0	0	0	0	Ribosome-binding protein 1;
HIPPOLYTE_1-2-3_TRINITY_DN212976_c4_g1	2572.13	4006.33	5407.95	433.844	1634.29	1527.68	3223.15	2449.59	4204.93	854.323	1302.75	1889.03	2.10525	0	0	1.23459	1.40763	0.472605	1.28515	0	1.63581	4.82903	7.53431
HIPPOLYTE_1-2-3_TRINITY_DN213136_c0_g1	0	0	0	0	0	0	0	0	16.7423	533.985	978.474	1078.75	0	0	0	0	0	0	0	0	0	0	0
HIPPOLYTE_1-2-3_TRINITY_DN213166_c0_g1	0	2.25577	0	498.95	854.529	975.955	9.18724	3.71692	12.714	10.0244	25.6717	12.7127	0	0.620317	1.68528	0	0	1.4914	4.81505	1.15553	0	0	6.1968	Oxygen-dependent choline dehydrogenase ;	Glucose dehydrogenase [FAD, quinone];
HIPPOLYTE_1-2-3_TRINITY_DN213342_c0_g1	213.277	363.461	333.451	191.616	424.176	502.645	419.085	317.48	639.459	458.5	487.48	537.94	7.16042	17.6811	0	4.57659	2.6091	1.68191	10.2158	15.7436	5.05144	2.38908	1.38923	Catenin alpha;	Catenin alpha;
HIPPOLYTE_1-2-3_TRINITY_DN213754_c0_g4	249.344	321.65	274.002	139.924	210.302	255.095	330.015	304.005	497.107	226.14	193.396	158.153	11.3325	22.7394	0	6.59805	6.29395	0	14.2864	13.6583	6.35405	1.64355	0
HIPPOLYTE_1-2-3_TRINITY_DN213763_c0_g2	84.6057	234.497	119.434	986.761	334.608	282.945	210.837	335.718	209.681	1777.42	485.332	569.621	7.55014	1.6399	9.16611	4.52163	14.9951	0.217653	0	11.8797	1.50156	0.439235	6.45232
HIPPOLYTE_1-2-3_TRINITY_DN213772_c0_g1	0	0	0	0	0.557859	3.10863	3.77842	0	336.749	3228.53	5969.85	3385.86	4.37637	5.54684	6.03714	6.827	3.89227	5.21506	3.54836	1.53323	3.76543	16.6797	18.128
HIPPOLYTE_1-2-3_TRINITY_DN213820_c3_g2	182.035	357.387	61.8314	380.527	66.4552	135.725	118.644	200.51	138.752	1714.78	790.538	1631.37	13.0276	17.4938	1.12068	1.92374	11.543	1.35901	16.415	0.779025	2.54825	1.46434	18.07
HIPPOLYTE_1-2-3_TRINITY_DN213853_c0_g2	287.688	470.999	420.834	293.043	429.823	393.369	484.792	407.032	607.844	410.131	388.764	278.845	4.59678	15.7364	4.75541	8.09706	0	2.75829	8.74687	16.1623	9.54099	11.2467	5.48799
HIPPOLYTE_1-2-3_TRINITY_DN214483_c0_g1	0	0	0	0	0	0	0.911719	1.90671	46.2609	474.789	1194.27	696.155	0.700965	0	2.17539	1.64817	1.21464	3.16146	0	0	2.82806	0	11.362
HIPPOLYTE_1-2-3_TRINITY_DN214542_c0_g1	0	2.31781	2.44215	608.992	1125.42	1188.65	0.750655	0	2.83677	34.1757	41.8266	30.5449	0	0.874344	0.894695	7.49194	0	0.969431	2.51607	0	0.90029	2.81047	3.10205	Glucose dehydrogenase [FAD, quinone];	Glucose dehydrogenase [FAD, quinone];
HIPPOLYTE_1-2-3_TRINITY_DN214853_c2_g1	515.362	174.889	58.3092	984.69	1023.7	1205.79	351.353	376.993	144.312	524.727	44.5127	4.76874	9.46497	3.08653	2.9913	11.2292	1.64908	13.808	6.01946	2.34799	1.53917	1.44092	0
HIPPOLYTE_1-2-3_TRINITY_DN215133_c0_g1	0	0	0	397.329	784.497	1076.3	0	0	0	0	0	0	0	0	0	0	0	0	0	0	0	0	0
HIPPOLYTE_1-2-3_TRINITY_DN215147_c1_g1	0	0	0	0	0	0	0.554164	0	31.0362	1066.34	1379.2	850.835	0	0	0	0	0	0	0	0	0.667318	3.87637	0
HIPPOLYTE_1-2-3_TRINITY_DN215373_c1_g1	217.226	609.415	527.112	319.189	656.12	702.932	592.79	558.622	997.097	385.687	457.53	545.881	2.30121	21.878	0	3.59473	3.07404	1.37469	9.34904	8.88011	1.19023	2.81529	0	Protein mab-21-like 2;	Protein mab-21-like 3;
HIPPOLYTE_1-2-3_TRINITY_DN215787_c0_g1	103.303	200.522	281.231	143.864	360.822	349.834	391.753	353.894	998.975	333.111	447.756	205.357	0	0	0	0.776332	0	0	0	0	0	3.46127	0
HIPPOLYTE_1-2-3_TRINITY_DN215787_c0_g2	255.052	601.284	848.926	337.091	963.014	964.489	1058.3	1229.65	2535.29	769.869	849.558	516.528	1.56719	0	0	0	0	0	0.647498	0	0	0	0
HIPPOLYTE_1-2-3_TRINITY_DN216004_c0_g4	0	0	0	0	0	0	10.0801	0	61.9903	767.886	1167.5	815.952	0	0	0	0	0	0	0	0	0	0.780746	0
HIPPOLYTE_1-2-3_TRINITY_DN216025_c3_g2	211.787	196.365	238.793	372.932	406.002	687.425	308.833	283.441	928.329	481.306	696.026	247.712	6.14731	25.2413	0	1.86228	16.9588	2.97922	20.0638	9.33248	5.02842	4.16791	18.5929	Hematopoietic prostaglandin D synthase;	Hematopoietic prostaglandin D synthase;
HIPPOLYTE_1-2-3_TRINITY_DN216367_c3_g3	0	0	0	0	0	0	0	0	3.39683	1386.36	2034.13	450.692	0	0	0	0	3.08999	0	0	0.811505	1.20246	2.79694	0	Proclotting enzyme;	Proclotting enzyme;
HIPPOLYTE_1-2-3_TRINITY_DN216503_c0_g1	101.111	295.016	441.965	153.027	303.807	332.987	479.325	330.157	354.979	227.297	319.535	135.019	0.427193	0	2.65163	0	0	0	0	0.450507	0	10.2737	0.764916
HIPPOLYTE_1-2-3_TRINITY_DN216920_c1_g1	7.83621	70.3115	4.53251	7294.43	10251.3	14096.6	7.16944	2.52969	3.66026	7.96572	0	3.07677	2.84345	0	0	2.16093	7.90493	3.44897	1.74661	4.93978	4.30484	3.86312	0
HIPPOLYTE_1-2-3_TRINITY_DN216920_c1_g2	0	31.2548	0	2129.75	4239.13	5379.41	0	0	0	0	0	19.3645	0	0	0	1.32944	0	0	0	0	0	0	0
HIPPOLYTE_1-2-3_TRINITY_DN217362_c0_g1	371.658	1203.78	1544.11	169.743	841.486	925.582	1237.9	1455.18	1601.62	360.209	795.672	305.863	0	0	0	0	0	0.704402	0	0.745979	0	4.70373	1.21398
HIPPOLYTE_1-2-3_TRINITY_DN217433_c4_g1	281.611	782.96	671.794	543.764	577.104	635.347	851.346	759.049	784.549	668.77	693.679	792.809	5.5814	18.929	0	0	9.87416	3.29463	5.99183	6.61559	9.46272	2.24146	3.74539
HIPPOLYTE_1-2-3_TRINITY_DN217913_c0_g1	5.82031	2.66942	0	441.225	1304.26	1729.32	1.61321	7.48572	0	3.94212	0	4.59505	3.73777	0	5.71599	0	0	0.823395	1.49384	0.968056	1.42663	0	11.5177	von Willebrand factor D and EGF domain-containing protein;	von Willebrand factor D and EGF domain-containing protein;
HIPPOLYTE_1-2-3_TRINITY_DN218029_c3_g2	303.234	446.942	466.228	294.34	229.001	246.653	428	300.821	544.534	457.233	332.068	413.895	4.59755	13.1154	0	1.79907	0	1.37853	11.2423	5.656	7.15377	5.62434	1.37195
HIPPOLYTE_1-2-3_TRINITY_DN218266_c0_g3	402.67	497.45	315.343	299.327	513.659	522.845	502.609	319.842	859.105	657.417	508.011	387.835	17.7357	21.1933	7.17934	13.5967	12.401	2.08624	14.4864	25.2394	10.8187	2.82991	12.4364	Nose resistant to fluoxetine protein 6;	Nose resistant to fluoxetine protein 6;
HIPPOLYTE_1-2-3_TRINITY_DN219188_c4_g1	9.5744	381.741	1.27125	44155.9	69624	84935.3	6.78749	0.452621	2.46034	5.80192	20.2219	22.7359	0.807697	3.66923	13.6058	24.9848	26.8331	0	0	8.85842	1.33714	14.2168	5.94976
HIPPOLYTE_1-2-3_TRINITY_DN219779_c0_g2	0	2.97619	0	674.071	420.73	898.151	0	0	0	0	0	0	0	0	0	0	0	0	0	0	0	0	0
HIPPOLYTE_1-2-3_TRINITY_DN220622_c5_g2	0	0	0	0	0	0	0	0	33.9052	459.699	667.438	628.787	0	0	0	0	0	0.690878	0	0	0	0	0
HIPPOLYTE_1-2-3_TRINITY_DN220967_c0_g1	7.04699	0	0.682989	0	0	0	0.910071	4.54216	95.1566	495.962	1866.98	1186.4	1.28853	0	2.0172	0	0	0	0	0	0.393941	0	4.78539
HIPPOLYTE_1-2-3_TRINITY_DN221054_c2_g1	759.769	1502.78	2026.83	492.023	2622.66	2987.96	2101.42	1700.35	5649.76	2469.12	3465.73	1532.73	0	0	0	9.83132	2.44362	0	0	1.18928	0	27.7698	28.7155	Ankyrin-2 ;	Ankyrin-2 ;
HIPPOLYTE_1-2-3_TRINITY_DN221395_c2_g3	214.582	393.898	431.675	241.064	527.871	449.132	482.169	453.636	397.782	362.485	341.676	259.147	0	0	0	1.81079	2.06352	0.702665	1.26714	2.43866	0	4.18636	0
HIPPOLYTE_1-2-3_TRINITY_DN221399_c1_g1	380.01	469.356	409.068	197.561	303.54	343.675	467.423	342.244	635.046	249.023	265.068	288.981	7.23487	5.50938	0	0	4.74781	1.91202	7.0532	7.26384	5.35599	3.91091	3.70189	Extended synaptotagmin-3;	Extended synaptotagmin-3;
HIPPOLYTE_1-2-3_TRINITY_DN221968_c3_g3	0.968575	0	6.08552	1.32599	0.887065	0.974308	3.02088	3.15644	45.4946	482.187	791.531	551.781	3.06287	6.12427	0	0.91138	1.03858	2.12201	1.91332	2.45478	1.21455	4.21386	0	Hi-UCF
HIPPOLYTE_1-2-3_TRINITY_DN222548_c0_g1	115.681	30.7001	5.15475	461.466	430.079	378.611	127.895	84.4279	34.8417	266.82	27.987	1.07776	0.50599	0	14.5377	14.3744	0	5.44858	1.48711	0	2.65118	0	0
HIPPOLYTE_1-2-3_TRINITY_DN222825_c4_g2	0	0	0	473.936	950.409	1118.56	2.00953	0	0	0	0	0	0.755826	0	0	0	0	0	0	0	0	0	0
HIPPOLYTE_1-2-3_TRINITY_DN222970_c0_g1	63.2	52.0777	45.3755	325.54	277.972	591.363	79.0748	106.897	208.623	322.611	625.107	452.38	3.29814	0	1.14943	2.86266	3.36131	0	0	0	4.83658	5.59034	0
HIPPOLYTE_1-2-3_TRINITY_DN223184_c1_g1	415.809	736.569	612.814	216.612	426.746	441.434	683.062	671.81	763.38	458.993	422.096	311.719	14.2605	27.9711	4.94792	18.7781	22.3429	12.1671	10.767	11.735	21.0064	11.1015	29.9403	Probable phospholipid-transporting ATPase IF;	Probable phospholipid-transporting ATPase IF;
HIPPOLYTE_1-2-3_TRINITY_DN223279_c0_g3	32.3808	17.1053	16.6592	729.712	319.238	369.076	17.7029	14.123	42.0039	21.2515	84.3364	34.4304	3.39351	2.80017	0	8.63836	4.63818	8.08775	10.8714	13.9548	3.42711	2.07554	2.02919	Prostaglandin G/H synthase 2;	Prostaglandin G/H synthase 2;
HIPPOLYTE_1-2-3_TRINITY_DN223295_c2_g3	93.0406	228.999	121.228	131.383	296.811	326.141	206.973	61.3986	637.058	513.012	664.247	389.959	3.0663	2.62397	0	4.49603	0	0	2.49626	20.193	0	2.81338	9.60279	Nitric oxide synthase-like protein;	Nitric oxide synthase, salivary gland;
HIPPOLYTE_1-2-3_TRINITY_DN224010_c0_g1	704.853	1096	891.801	614.155	1013.14	959.418	1427.71	955.294	2029.92	1051.59	1117	1511.74	2.23753	13.5415	0	12.223	11.9461	1.33448	25.1285	11.7869	19.6611	2.73743	6.66475	Protein unc-13 homolog D;	Protein unc-13 homolog 4B ;
HIPPOLYTE_1-2-3_TRINITY_DN224212_c3_g1	1191.8	1415.42	1362.42	1033.43	862.965	866.142	1033.42	791.103	1104.3	4886.07	2252.61	1517.56	1.71315	1.03425	0	0	4.61652	0.43219	1.86595	0	1.4469	21.3386	16.4815
HIPPOLYTE_1-2-3_TRINITY_DN224602_c0_g1	526.111	737.167	584.891	387.62	442.016	479.952	735.697	616.638	1237.11	323.079	715.145	726.954	9.7093	21.3372	0	3.53785	2.42028	3.24835	7.02047	4.4492	6.56095	1.1078	3.23933	Protein mono-ADP-ribosyltransferase PARP12 ;	Protein mono-ADP-ribosyltransferase PARP12 ;
HIPPOLYTE_1-2-3_TRINITY_DN224633_c3_g1	276.423	574.858	510.327	133.82	310.424	385.344	518.211	358.231	813.819	195.65	535.407	362.875	2.59353	10.1511	9.37351	0	0.65497	10.1781	19.1499	17.3363	4.3763	2.31997	2.38169
HIPPOLYTE_1-2-3_TRINITY_DN224675_c0_g1	464.719	2298.62	2346.41	715.096	2902.91	2478.66	2862.06	2059.96	2333.57	1115.97	2482.23	1722	3.69579	0.84374	0	0	0	0	0.605997	0	3.46826	24.4122	14.1207
HIPPOLYTE_1-2-3_TRINITY_DN224719_c6_g3	194.275	465.492	484.114	136.952	433.494	338.331	340.296	290.975	334.974	468.224	398.007	437.816	3.72067	8.4982	0	1.46858	1.67385	0	4.61107	0.659386	1.95312	1.13767	7.81502
HIPPOLYTE_1-2-3_TRINITY_DN224871_c1_g1	465.497	155.024	30.2292	1953.34	1319.36	2008.53	322.516	308.69	144.578	433.074	0.7337	92.6408	0.474689	3.25218	12.5199	4.49005	0	6.92654	1.56511	6.84851	1.49201	0	0
HIPPOLYTE_1-2-3_TRINITY_DN224977_c1_g1	256.894	710.226	668.648	451.417	989.254	842.15	656.763	553.003	560.283	405.627	645.126	746.953	0	0	0	0	0	0	0	2.70235	2.34814	2.64225	1.31736		Neurofilament heavy polypeptide;, Neurofilament heavy polypeptide;
HIPPOLYTE_1-2-3_TRINITY_DN224977_c1_g2	641.575	1428.1	1542.77	788.254	1579.36	1539.75	1478.57	1245.47	1617.04	797.162	853.78	1516.44	0.536743	0	0	3.84387	1.45997	0	0	5.17621	0.854678	1.9691	1.94251
HIPPOLYTE_1-2-3_TRINITY_DN225620_c1_g1	335.87	590.738	417.221	391.729	476.165	283.108	537.341	438.302	39.0017	353.959	222.551	405.725	15.9273	22.5466	9.40985	5.45904	4.14613	24.1876	29.4215	15.5162	2.43261	1.39106	1.37687
HIPPOLYTE_1-2-3_TRINITY_DN225839_c5_g1	96.8483	412.726	469.863	370.96	420.769	460.002	495.127	374.516	403.675	320.787	346.199	264.531	6.89911	4.10047	0	0	0	7.00791	13.0432	2.32499	0	3.68833	4.40387
HIPPOLYTE_1-2-3_TRINITY_DN226114_c0_g2	37.6921	17.8364	50.114	101.354	138.598	174.9	74.1083	98.929	55.9558	505.03	702.145	419.601	0	7.08674	0	0	0	0.598517	16.8633	3.80877	9.26496	0.605002	0	SET domain-containing protein SmydA-8, isoform A ;	SET domain-containing protein SmydA-8, isoform A ;
HIPPOLYTE_1-2-3_TRINITY_DN226161_c2_g1	1.666	16.9809	1.03739	668.478	1227.78	1143.67	0	1.31706	0	6.81707	1.02694	0.630691	6.86785	0	0	0	0	0	0	0	0	0	0
HIPPOLYTE_1-2-3_TRINITY_DN226287_c1_g1	492.612	646.685	744.968	199.757	208.892	168.79	712.343	769.837	241.001	14.6079	67.5412	63.7594	0	0	0	0	0	0	0	0	0	0	0	Endoplasmic reticulum aminopeptidase 2;	Endoplasmic reticulum aminopeptidase 2;
HIPPOLYTE_1-2-3_TRINITY_DN226727_c3_g2	246.115	467.872	469.272	458.537	505.261	490.531	561.713	480.154	733.595	463.369	592.701	267.735	7.53691	25.0097	3.50596	12.7814	15.5958	0.720476	10.3268	13.9245	12.2531	2.76431	4.13013
HIPPOLYTE_1-2-3_TRINITY_DN226758_c0_g2	724.844	638.321	727.415	350.056	401.203	358.788	824.785	713.276	468.416	88.9269	103.745	102.046	0.784949	0.8959	0	1.56499	2.10617	0.709408	0	12.4451	0	0	9.85334	Xaa-Pro aminopeptidase 1;	Xaa-Pro aminopeptidase 1;
HIPPOLYTE_1-2-3_TRINITY_DN227129_c0_g1	277.557	459.621	457.462	178.823	502.115	373.79	501.318	348.039	568.724	416.092	459.339	241.1	3.05927	2.61905	2.37341	3.60423	4.10875	4.15622	3.76134	4.04637	8.37183	7.01658	9.6075
HIPPOLYTE_1-2-3_TRINITY_DN227212_c1_g2	332.077	620.701	620.099	549.93	572.651	642.702	680.995	522.623	1012.93	978.198	796.852	336.487	6.45402	3.11124	0	0	0.782845	0	1.12007	2.16652	0	10	11.5048	Calpain-B;	Calpain-B;
HIPPOLYTE_1-2-3_TRINITY_DN227290_c1_g1	24.1853	150.943	136.669	903.892	369.151	427.402	161.864	129.084	615.431	691.608	766.042	1080.73	0	3.92312	15.9999	0.777428	2.76767	0.621675	3.93938	27.6198	18.2545	12.9054	8.97935	Actin, alpha skeletal muscle;
HIPPOLYTE_1-2-3_TRINITY_DN227805_c0_g2	663.612	1198.31	1053.83	351.968	717.74	925.181	1107.63	805.98	1522.99	599.156	695.298	983.012	6.90695	25.3884	0	4.49147	4.09708	1.37296	16.8124	19.367	8.32509	1.40835	10.9719		Reticulocyte-binding protein 2 homolog a ;
HIPPOLYTE_1-2-3_TRINITY_DN228414_c3_g1	399.679	464.29	369.751	131.648	315.647	175.124	470.641	307.718	400.609	130.909	52.8055	99.4137	0	0	0	0	0	0	0	0	0	2.5063	0
HIPPOLYTE_1-2-3_TRINITY_DN228643_c3_g1	192.725	459.754	460.59	186.66	386.109	384.324	614.438	431.043	653.819	341.544	337.657	317.34	0	0	0	0	0	0	0	0	0	0	0	Serine/threonine-protein phosphatase 6 regulatory ankyrin repeat subunit C;	Transient receptor potential cation channel subfamily A member 1 homolog;
HIPPOLYTE_1-2-3_TRINITY_DN229364_c2_g1	186.407	444.762	401.732	266.364	345.15	352.649	472.469	394.202	670.975	352.474	396.702	367.222	7.64827	14.0666	0	3.39932	9.00038	7.30436	10.465	6.35493	1.30789	4.6277	3.33748
HIPPOLYTE_1-2-3_TRINITY_DN230553_c8_g1	2411.38	4116.19	3980.87	1151.11	1900.14	1872.4	4108.19	2772.83	3976.29	1795.5	1602.3	1739.5	5.35384	14.8311	7.12185	4.4725	2.03994	17.0765	7.43713	7.23212	1.18389	2.80719	6.83053	Spectrin beta chain, non-erythrocytic 1;	Spectrin beta chain, non-erythrocytic 1;
HIPPOLYTE_1-2-3_TRINITY_DN230573_c7_g1	761.002	915.242	850.976	380.964	919.956	880.222	1125.14	796.161	1383.57	603.997	536.731	496.833	13.1691	18.2873	3.55436	6.06622	9.92765	15.3443	22.7389	15.6427	4.43221	17.2206	11.1398

## Sheet: Eye specific
Name	01.Body_I	02.Body_I	03.Body_I	04.Body_M	05.Body_M	06.Body_M	07.Body_YF	08.Body_YF	09.Body_YF	10.Body_MF	11.Body_MF	12.Body_MF	13.Eye_I	15.Eye_I	16.Eye_M	17.Eye_M	18.Eye_M	19.Eye_YF	20.Eye_YF	21.Eye_YF	22.Eye_MF	23.Eye_MF	24.Eye_MF	Trinotate Annotation
HIPPOLYTE_1-2-3_TRINITY_DN157032_c0_g1	0	0	0	0	0	0	0	0	0	0	0	0	49.9876	47.0385	114.045	82.0955	106.218	25.4501	35.7876	49.4976	357.751	766.364	375.231
HIPPOLYTE_1-2-3_TRINITY_DN159750_c0_g1	0	0	0	0	0	0	0	0	0	0	0	0	0.724954	2.50785	213.95	328.756	322.38	46.9693	0.688093	4.20392	975.202	1388.46	893.448
HIPPOLYTE_1-2-3_TRINITY_DN163802_c0_g1	12.4241	9.78092	1.19489	17.1668	11.4615	9.57255	7.03714	0	3.40964	22.1421	10.5716	13.902	453.864	261.758	1105.49	908.577	1124.18	273.734	223.07	201.987	1033.16	1462.5	1867.4
HIPPOLYTE_1-2-3_TRINITY_DN164659_c0_g1	0	0	0	0	0	0	0	0	0	0	0	0	19.3863	27.575	315.097	338.626	657.741	78.2279	20.2113	39.6259	1430.02	2834.96	1511.67
HIPPOLYTE_1-2-3_TRINITY_DN168780_c0_g1	0	0	0	0	0	0	0.995841	0	0	0	0	0	189.898	273.517	1543.44	1784.91	2224.77	370.827	153.233	75.997	1900.33	2881.75	3382.37
HIPPOLYTE_1-2-3_TRINITY_DN168841_c0_g1	18.366	8.75226	18.283	6.57554	9.69032	7.80149	20.9372	4.16936	1.13092	4.39298	5.90285	7.57078	123.837	142.242	186.212	293.88	320.618	168.555	112.954	78.5332	479.989	492.3	549.06
HIPPOLYTE_1-2-3_TRINITY_DN169361_c0_g1	9.6458	0	0	0	2.64326	0	0	0	0	2.19982	23.5892	6.77022	237.196	179.431	403.482	433.586	389.172	152.128	139.937	68.1371	470.966	597.472	653.692
HIPPOLYTE_1-2-3_TRINITY_DN169755_c0_g1	0.538563	0	0	0	0	0	0	0	0	0	0	0	5.94976	12.9494	245.981	206.636	394.969	37.7092	22.6316	7.94672	584.276	515.717	673.198
HIPPOLYTE_1-2-3_TRINITY_DN169780_c0_g1	8.14431	4.71512	5.79515	3.64973	12.4693	8.77527	13.6912	8.7356	4.85186	18.1857	13.4353	3.45021	37.0811	44.106	333.358	205.196	448.935	60.9071	21.8566	18.6425	815.339	1378.53	1198.24
HIPPOLYTE_1-2-3_TRINITY_DN170380_c0_g1	0	2.16062	0	1.30839	2.62336	3.85124	1.02837	2.07803	1.12592	10.193	21.1385	11.1091	628.404	296.407	3785.22	1395.11	1409.1	390.291	154.95	92.655	2063.6	3049.57	3084.68
HIPPOLYTE_1-2-3_TRINITY_DN170454_c0_g1	0.968642	2.19069	1.22334	1.3141	1.76157	0	0.995471	0	0	0	1.18165	0	5801.87	3390.29	7455.24	18783.5	11426.6	5286.35	2441.03	1913.62	7028.2	12597.6	10918.4	La-related protein 6;
HIPPOLYTE_1-2-3_TRINITY_DN171729_c0_g1	2.20557	4.19753	1.82477	1.03049	2.05762	0	8.37364	1.6416	0	0	0	2.20377	104.17	84.3229	682.717	581.198	879.85	101.241	43.9297	29.994	656.084	1178.1	1459.02
HIPPOLYTE_1-2-3_TRINITY_DN171798_c0_g1	0	0	0	0	0	0	0	0	0	0	0	0	219.806	290.333	1392.29	690.325	1115.8	194.778	132.889	188.262	1118.81	1987.99	1335.27
HIPPOLYTE_1-2-3_TRINITY_DN171846_c8_g2	0	0	0	0	0	0	0	0	0	0	0	0	61.0569	41.5591	273.289	351.573	277.036	58.4253	22.3462	19.8019	494.508	425.543	669.869
HIPPOLYTE_1-2-3_TRINITY_DN171894_c1_g1	0	1.58739	0	0	0	0	0	0	0	0	0	0	81.3633	166.64	272.855	363.889	344.478	231.593	230.079	134.704	872.288	756.576	1154.93
HIPPOLYTE_1-2-3_TRINITY_DN172031_c2_g1	0	0	0	1.36345	0	0.873623	0	0	0	0	0	0	118.919	461.031	5936.52	2735.35	3638.22	370.048	197.332	87.0583	5333.02	8494.4	8373.13	Arrestin homolog;
HIPPOLYTE_1-2-3_TRINITY_DN172275_c0_g5	0	1.62989	0	0	0	0	0	0	0	0	0	0	414.022	1071.09	2023.14	2032.67	2259.98	792.298	513.613	401.038	4113.21	5612.16	2591.31
HIPPOLYTE_1-2-3_TRINITY_DN172584_c0_g1	9.28089	3.57073	0	13.0751	0	2.37881	3.68053	0	0.626077	9.13324	6.00587	4.69312	11055.3	26002.9	96032.7	79178.7	79397	27596.2	12175.9	6360.26	134200	190024	202056	Arrestin, lateral eye;
HIPPOLYTE_1-2-3_TRINITY_DN172696_c8_g1	0	0	0	0	0	0	0	0	0	0.536116	0	0	38.9239	76.6794	306.453	533.595	460.391	185.651	60.4995	15.9246	576.659	673.09	786.649
HIPPOLYTE_1-2-3_TRINITY_DN173007_c1_g1	0	0	0	0	0	0	0	0	0	0	0	0	1348.31	3725.4	6423.29	6297.79	5873.24	3353.31	2138.45	2175.98	8619.63	12548.3	6600.84
HIPPOLYTE_1-2-3_TRINITY_DN173597_c0_g1	0	1.48231	3.2984	3.85976	1.1945	0.659834	3.38231	10.2465	0	5.96097	9.5989	1.02289	647.285	1230.18	5123.44	2388.46	2705.69	737.917	329.63	181.261	5170.24	10596.7	11800.8
HIPPOLYTE_1-2-3_TRINITY_DN173867_c0_g1	0.967431	1.09455	1.22064	0	0	0.976508	0	1.04181	0	1.0976	0	0	125.476	81.2151	3887.98	2351.88	2981.01	283.038	197.327	122.163	1300.43	423.965	1228.29	Hi-UCMe
HIPPOLYTE_1-2-3_TRINITY_DN173982_c1_g1	0	0	0	1.34361	1.77586	0	0	0	0	4.52772	3.47176	0.654079	834.703	2430.62	12109.9	10709.8	8040.73	2045.17	1032.24	426.571	17022.2	27948.5	35187.5	Rhodopsin;
HIPPOLYTE_1-2-3_TRINITY_DN173982_c2_g1	9.94693	3.27892	0	3.7536	1.25312	1.0205	3.63979	0	0	1.57666	0	6.83939	7652.79	35959.2	29318.6	10009	17392.2	27205.6	9113.81	4085.94	8910.3	8454.89	5078.91	Rhodopsin;
HIPPOLYTE_1-2-3_TRINITY_DN174216_c1_g1	0	0	0	2.63679	0	0	0	0	0	0	0	0	17.4959	75.6566	929.476	428.866	540.316	39.9541	25.2805	5.68665	627.532	1160.01	1280.81	Arrestin, lateral eye;
HIPPOLYTE_1-2-3_TRINITY_DN174919_c6_g1	0.964398	9.83326	2.42776	5.26517	0.881138	5.82881	8.98912	4.17554	11.3219	2.20026	5.89693	3.75881	526.909	447.635	904.858	1033.58	782.651	497.643	244.702	172.81	627.387	570.717	553.491	Fatty acid-binding protein, liver;
HIPPOLYTE_1-2-3_TRINITY_DN175104_c4_g3	0	0	0	0	0	0	0	0	2.95891	0	1.52077	0.931221	60.367	225.46	5340.7	2184.23	2994.92	484.191	202.401	96.0951	3263.39	3723.57	207.122	Cuticle protein 19.8;
HIPPOLYTE_1-2-3_TRINITY_DN175104_c4_g4	0	0	0	0	0	0	0	0	0	0	0	0.508936	117.221	247.603	6500.56	2271.05	4710.87	867.656	202.739	174.36	4430.63	4293.99	261.762
HIPPOLYTE_1-2-3_TRINITY_DN175104_c4_g5	0	0	0	0	0	0	0	0	0	0	0	1.35655	53.5821	122.344	3753.39	1607.75	2230	314.297	140.695	66.7767	2150.82	3033.82	172.793
HIPPOLYTE_1-2-3_TRINITY_DN175284_c2_g1	0	0	0	0	0	0	0	4.16731	0	0	0	1.51782	44.3745	17.4652	136.52	204.477	425.135	62.2869	18.7941	30.7436	346.639	411.319	348.59
HIPPOLYTE_1-2-3_TRINITY_DN175691_c2_g1	0	0	0.737052	0	1.85667	0	0	0	0	0	0	0.420237	1095.85	1527.21	4807.65	4956.66	4504.96	1229.6	942.994	974.388	5600.95	7743.37	6840.36
HIPPOLYTE_1-2-3_TRINITY_DN176707_c5_g2	4.75744	2.16779	2.37166	0	3.52767	0.950431	0	3.15663	1.13848	4.44207	1.17236	1.44386	52.6139	69.6951	251.73	422.834	480.412	79.1088	41.5328	22.1639	468.972	574.775	698.366
HIPPOLYTE_1-2-3_TRINITY_DN176852_c7_g1	1.91418	1.08515	2.46618	0	0	1.92595	0	1.03907	0	2.2465	5.85828	1.48663	139.507	78.7278	901.647	629.959	810.548	109.052	60.4634	29.0891	793.817	1417.27	1369.13
HIPPOLYTE_1-2-3_TRINITY_DN176926_c7_g3	0	0	0	0	0	0	1.0169	0	0	0	0	0	158.851	269.877	664.526	518.149	807.559	196.223	142.165	148.318	1139.17	1634.96	1531.02	MORN repeat-containing protein 4 homolog;
HIPPOLYTE_1-2-3_TRINITY_DN177012_c2_g1	0.867024	5.7753	15.998	4.53277	8.00727	8.02673	10.0314	1.41383	2.04368	10.7762	11.6807	2.40393	195.805	120.226	1736.85	652.902	1046.89	353.764	159.396	241.876	2271.16	3411.55	2123
HIPPOLYTE_1-2-3_TRINITY_DN177293_c0_g1	0	0	0	0	0	0	0	0	0	0	0	0	32.142	24.4567	306.368	410.657	366.519	29.0465	10.0182	39.6341	284.357	237.312	268.975
HIPPOLYTE_1-2-3_TRINITY_DN177531_c2_g1	0	3.11316	0	0	0	0	4.55303	0	0	1.65765	1.69565	0	3542.15	8719.23	35556.8	29806.8	28355.3	9952.75	4340.28	2142.9	48334.8	72364.4	78089.2	Arrestin, lateral eye;
HIPPOLYTE_1-2-3_TRINITY_DN177646_c0_g1	12.1398	5.37542	8.66468	13.3472	0.894148	10.8934	8.09413	8.46245	6.88648	0	4.79383	1.53825	2438.9	2496.84	6620.2	8353.45	7535.64	2915.1	1931.48	741.633	8467.8	8919.7	8527.37	Single insulin-like growth factor-binding domain protein-2;
HIPPOLYTE_1-2-3_TRINITY_DN178246_c0_g3	0	0	0	0	0	0	0	0	0	0	0	2.1362	223.65	280.193	816.554	372.265	456.194	216.109	96.9565	73.3339	637.77	1325.22	981.656	Cuticle protein AM1199;
HIPPOLYTE_1-2-3_TRINITY_DN178246_c2_g1	0	0	0	0	0	1.8602	0	0	0	0	0	6.22633	1031.55	1348.59	4087.15	2271.87	3643.3	1490.93	835.453	701.661	3678.13	4995.69	3177.83	Cuticle protein AM1199;
HIPPOLYTE_1-2-3_TRINITY_DN178526_c2_g1	0	0	0	0	0	0	0	0	0	0	0	0	1482.97	864.298	7526.33	5354.38	5740.24	1624.3	751.688	473.535	5295.11	8703.85	7710.06	Arrestin homolog;
HIPPOLYTE_1-2-3_TRINITY_DN178526_c2_g3	0	2.41946	0	0	0	0	0	0	0	0	0	0	1709.51	1237.75	13926	10729.8	10985.6	3011.54	1130.56	617.851	11757.7	17819	15972.3	Arrestin, lateral eye;
HIPPOLYTE_1-2-3_TRINITY_DN178526_c2_g4	0	18.6037	1.21989	22.3529	0.880904	0	2.98998	0	2.26133	2.19574	3.54246	15.1633	70139.5	32511.9	574112	382867	449329	82907	29841.5	17164.8	408785	664391	640394	Arrestin homolog;
HIPPOLYTE_1-2-3_TRINITY_DN178526_c3_g1	0	0	0	0	0	0	0.767436	0	0	0	0	0.513258	442.183	1083.28	7446.41	6118.3	6147.04	1311.86	497.266	204.501	8060.17	8814.69	6927.78	Arrestin homolog;
HIPPOLYTE_1-2-3_TRINITY_DN178533_c9_g3	0	0.703914	0	0	0	0	0	0	0	0	0	0	379.432	512.982	3165.86	2693.68	1649.25	575.162	411.699	700.025	1450.51	946.607	622.426
HIPPOLYTE_1-2-3_TRINITY_DN179527_c1_g4	14.5792	6.33676	9.92998	14.8683	8.02587	16.0605	10.4898	4.34889	22.1272	5.67606	12.6787	17.1873	72.437	36.258	314.406	181.175	236.379	28.9471	26.0724	51.8583	349.981	466.877	456.946
HIPPOLYTE_1-2-3_TRINITY_DN179726_c2_g1	0	0	3.69762	0	0.629482	0	0	0	0	0.396111	0	0	4611.93	6831.98	12471.1	9480.19	6827.75	4604.97	5814.07	6733.15	32607.4	41383.4	25299.1
HIPPOLYTE_1-2-3_TRINITY_DN180209_c1_g1	0	0	0	0	0	0	0	0	0	0	0	0	961.388	953.657	6637.89	5466.03	7285.29	1214.66	652.443	231.336	3445.34	8480.84	8326.02	Arrestin homolog;
HIPPOLYTE_1-2-3_TRINITY_DN180222_c0_g1	2.90447	0	1.03142	2.24638	0	0	8.35063	0	0	0	4.01896	0	299.816	192.533	712.063	628.952	820	206.927	185.727	99.0747	1006.62	1411.68	1446.25
HIPPOLYTE_1-2-3_TRINITY_DN180222_c0_g2	6.67118	4.33865	10.7074	0	5.29459	3.82123	11.0717	9.46423	13.6455	3.32373	15.2457	7.29466	812.819	848.28	2274.47	2287.79	2717.93	758.534	781.594	389.783	3153.07	4145.87	4746.43
HIPPOLYTE_1-2-3_TRINITY_DN180400_c2_g1	7.96997	9.61839	12.9726	25.6269	4.45018	6.84211	3.34982	12.3837	15.9849	18.0189	14.0793	26.5421	64.5731	78.278	794.703	495.339	602.06	107.846	65.1035	84.5339	867.459	1215.37	1083.59
HIPPOLYTE_1-2-3_TRINITY_DN180400_c2_g3	5.13035	4.16826	0.986774	12.2593	0.918025	3.97102	13.7197	0	9.2468	5.25154	10.8804	7.45286	25.0612	26.597	293.325	160.395	224.511	43.5252	14.8024	21.3908	346.196	409.723	365.952
HIPPOLYTE_1-2-3_TRINITY_DN180490_c0_g1	0	0.788074	0	2.89316	0	0	0.736026	0	0	0	0	0.521186	6130.78	3732.64	63588.5	46724.8	49169.2	8794.67	3600.02	1894.7	46964.5	74367.1	69398	Arrestin homolog;
HIPPOLYTE_1-2-3_TRINITY_DN180787_c4_g1	2.27698	0.171607	1.29537	0	0.831466	5.85074	1.21284	14.77	1.60374	21.0981	0.370587	0.868824	21.5085	17.4346	321.385	373.798	223.231	27.5596	16.0332	3.21038	427.472	537.321	707.67
HIPPOLYTE_1-2-3_TRINITY_DN181016_c5_g3	11.5226	10.8978	9.63763	13.183	0	4.8231	2.00382	15.6984	2.26863	2.20685	4.70831	9.6475	156.353	124.926	722.806	592.416	1025.41	205.012	114.555	56.1945	486.843	903.531	699.728
HIPPOLYTE_1-2-3_TRINITY_DN181243_c0_g2	0	0	0	0	0	0	0	0	0	0	0	0	284.088	374.942	3381.53	2776	3090.14	487.509	190.633	76.3344	2217.74	3743.59	3470.87	Arrestin homolog;
HIPPOLYTE_1-2-3_TRINITY_DN181243_c0_g3	0	0	0	0	0.91784	0	0	0	0	0	0	0	47.3541	49.5634	703.918	559.352	580.812	82.0302	24.0735	10.1838	461.607	712.437	742.563	Arrestin homolog;
HIPPOLYTE_1-2-3_TRINITY_DN181243_c1_g1	1.10489	5.58528	0	0	11.9818	0	0	0	0	0	0	1.63504	1442.41	2372.75	20919.5	18334.1	19451	3061.06	1233.34	528.553	16433.9	22382.6	21261.8	Phosrestin-2;
HIPPOLYTE_1-2-3_TRINITY_DN181243_c1_g2	0	0.564301	0	0	0	0	0	0	0	0.606002	0	0.340964	858.074	1133.59	9125.28	7971.37	9503.63	1798.15	551.326	230.36	8036.66	10751.9	9730.44	Arrestin homolog;
HIPPOLYTE_1-2-3_TRINITY_DN181243_c1_g3	0	0	0	0	0	0	0	0	0	0	0	0	87.8233	215.749	975.712	869.645	823.465	217.625	97.7777	32.8219	630.641	985.128	928.233	Arrestin, lateral eye;
HIPPOLYTE_1-2-3_TRINITY_DN181243_c1_g5	0	0	0	0	0	0	0	0	1.14286	0	0	0	1302.72	3203.97	14732.8	17502.6	13733.8	4236.16	1753.78	610.741	8269.97	14443.2	18684.3	Arrestin homolog;
HIPPOLYTE_1-2-3_TRINITY_DN181243_c2_g1	0	0	0	0	0	0	1.17764	0	0	0	0	0	142.978	298.425	1698.71	1329.58	1509.73	297.595	154.349	64.1836	1237.15	1748.39	1572.3	Arrestin homolog;
HIPPOLYTE_1-2-3_TRINITY_DN181243_c3_g1	0	0	0	0	0	0	0	0	0	0	0	0	584.027	990.951	7257.84	6866.03	7995.5	1253.78	529.883	183.821	6034.34	8286.76	8421.26	Phosrestin-2;
HIPPOLYTE_1-2-3_TRINITY_DN181243_c4_g1	0	0	0	0	0	0	0	0	0	0	0	0	95.6337	212.492	2156.94	1976.52	1939.93	285.415	112.413	42.7719	1704.03	2502.76	2293.15	Phosrestin-2;
HIPPOLYTE_1-2-3_TRINITY_DN181252_c0_g1	0	0	0	0	0	0	0	0	0	0	0	0	278.392	298.128	1900.35	1579.95	1765.03	261.797	187.528	50.6228	2952.17	4862.54	4857.55	Opsin, ultraviolet-sensitive;
HIPPOLYTE_1-2-3_TRINITY_DN181391_c0_g1	0	0	0	1.44748	1.30927	2.07818	0	0	0	0	0	0	77.9394	87.0627	1253.39	741.538	1038.28	296.063	98.7033	104.833	1807.87	3306.84	1843.76
HIPPOLYTE_1-2-3_TRINITY_DN181495_c0_g1	4.58904	15.5849	5.78427	0	5.85832	9.25627	12.3174	16.8386	3.22378	9.39314	0	10.3981	78.2876	278.585	114.861	148.668	150.464	369.211	367.008	316.251	390.099	241.387	301.14	Pro-neuropeptide Y;
HIPPOLYTE_1-2-3_TRINITY_DN182119_c3_g2	0	0	0	0	0	0	0	0	0	0	1.13628	0	333.552	461.675	1193.6	1136.41	1016.3	377.014	317.952	333.022	1244.71	1692.88	1586.77
HIPPOLYTE_1-2-3_TRINITY_DN182119_c5_g1	0.902078	0	0	0	0.89613	0	3.19194	0	0	1.13613	0	0	2074.47	2768.86	7706.39	7159.7	6770.95	2491.53	1631.13	1899.78	7640.98	11558.8	11068.6
HIPPOLYTE_1-2-3_TRINITY_DN182119_c5_g2	0	0	0	6.39604	3.51768	0	4.1283	0.856336	2.75355	4.48177	0	0	5199.7	8491.66	12711.3	9413.5	8404.86	7089.59	6324.89	5370.73	11171.7	17078.5	13359.3
HIPPOLYTE_1-2-3_TRINITY_DN182119_c5_g3	0	0	0	0	1.66358	2.02444	0	1.70881	1.83082	0	0.378659	0	1632.85	1958.13	6875.57	7170.44	8855.81	2110.77	1663.06	1610.48	9234.15	13645.2	9549.16
HIPPOLYTE_1-2-3_TRINITY_DN182233_c4_g2	0	0	0	1.44801	0	0.384282	0	3.23105	0	0	0	2.20051	940.443	709.5	31649.9	16139.1	29230.2	2263.72	565.023	236.386	36090.7	80167.6	73323.3
HIPPOLYTE_1-2-3_TRINITY_DN182302_c2_g2	5.1336	0	0	0	0	0	0	0	0	0	0	0	25.1418	65.889	480.355	322.055	540.948	73.5438	14.8127	6.36111	737.277	1414.86	1281.88
HIPPOLYTE_1-2-3_TRINITY_DN182364_c35_g2	0.61632	0	0	0.879732	0.569704	0	0	0.838543	1.46965	0	0	0	250.64	199.606	375.658	553.18	481.998	173.623	164.652	68.9547	787.169	751.213	952.142
HIPPOLYTE_1-2-3_TRINITY_DN182479_c5_g1	13.5226	5.82563	11.6945	4.75195	8.68033	3.87075	4.609	8.39547	3.02658	2.65492	12.0382	3.42969	201.273	60.0338	355.92	319.859	516.352	136.518	71.2557	98.4602	393.4	467.26	661.807
HIPPOLYTE_1-2-3_TRINITY_DN182974_c0_g1	3.87738	0	19.5986	0	2.64219	3.91876	2.98479	5.2027	0	8.76832	26.0046	0.763544	1176.15	683.213	3158.96	2422.04	2350.48	1306.84	544.604	137.291	2715.76	3822.74	4308.73
HIPPOLYTE_1-2-3_TRINITY_DN183645_c1_g1	28.0042	10.934	13.3838	6.57797	8.8101	11.6829	18.9574	6.25791	9.05153	9.89129	7.08027	5.28348	94.6866	97.6506	155.199	159.714	229.364	138.429	61.6281	38.8967	356.13	493.146	443.466
HIPPOLYTE_1-2-3_TRINITY_DN183941_c0_g1	2.70795	20.12	0	9.09147	2.66402	0	3.54303	0.661527	0	26.941	10.6151	22.8803	19113.2	23259.2	248546	131387	204820	36842.6	9085.11	3651.49	213290	359400	268985	Rhodopsin;
HIPPOLYTE_1-2-3_TRINITY_DN183941_c0_g2	0	0	0	2.65882	1.90071	0	0	0	0	3.34494	0	5.57838	3480.45	2493.79	79035.9	44484.8	61149.5	8136.81	1931.58	700.391	67648.7	102018	79476.1	Rhodopsin;
HIPPOLYTE_1-2-3_TRINITY_DN184592_c3_g1	0	0	0	0	0	7.51095	0	0	0	0	0.571786	1.43005	36.9843	43.8446	553.175	380.5	502.986	106.999	23.0477	114.066	1118.61	1814.35	1244.65
HIPPOLYTE_1-2-3_TRINITY_DN184679_c6_g1	7.72047	9.83701	7.29226	3.94768	8.81054	3.89033	5.9893	6.2603	1.13177	1.09952	11.7972	2.26011	157.96	201.294	215.468	333.161	549.542	361.667	248.096	189.727	764.654	933.805	899.414
HIPPOLYTE_1-2-3_TRINITY_DN184721_c0_g1	0	0	0	0	0	0	0	0	0	0	0	0	36.8706	12.9945	665.352	289.464	380.493	24.3668	12.8738	1.15874	516.598	1471.01	1180.6
HIPPOLYTE_1-2-3_TRINITY_DN184743_c0_g1	13.5106	13.1159	15.7994	6.57951	7.9295	13.6158	7.98584	7.30376	3.39533	3.2986	4.71884	3.01331	409.773	535.905	7678.57	6888.16	6132.53	689.921	355.786	125.676	6073.01	7599.09	11220.1	La-related protein 6;
HIPPOLYTE_1-2-3_TRINITY_DN184743_c0_g2	10.4637	7.29822	7.08627	1.10014	1.47245	5.67186	6.68082	3.49076	0.946361	0	7.87915	0	458.255	451.486	7747.68	6303.03	8323.06	483.892	316.973	71.9197	5948.3	8974.38	12818
HIPPOLYTE_1-2-3_TRINITY_DN184930_c0_g1	0	2.13457	0	4.01332	0.885731	0	4.11545	0	3.45252	2.25584	13.9286	0.66867	3878.53	10181.1	35350.5	33403.5	30617.1	8759.88	5228.61	2254.7	53758.9	75541.5	77232.9	Arrestin, lateral eye;
HIPPOLYTE_1-2-3_TRINITY_DN184936_c2_g1	0	1.5529	0	0	0	0	0.538232	0	0	5.4075	0	0	2705.49	2726.38	30232.4	24388.5	38159.7	4458.14	1574.33	543.14	20079.7	38021.5	37878.5
HIPPOLYTE_1-2-3_TRINITY_DN184936_c3_g1	0	0	0	0	0	0	0	0	0	0	0	0	87.4555	75.8147	1226.56	774.057	920.357	196.24	54.6533	38.5017	816.889	1129.6	872.338
HIPPOLYTE_1-2-3_TRINITY_DN184963_c0_g1	1.72971	3.18393	6.27536	4.69138	0	2.84103	2.8978	9.0898	2.0167	8.80777	5.27437	12.2511	73.8774	275.341	580.641	333.519	554.094	615.089	172.268	381.083	623.52	706.727	979.117	Arrestin homolog;
HIPPOLYTE_1-2-3_TRINITY_DN185145_c1_g1	8.80888	0	3.71975	6.01652	5.45614	0	11.0659	3.11293	0	3.88326	1.1192	0.750909	167.049	117.834	323.579	360.83	595.795	187.593	114.633	70.1823	536.761	987.699	799.799
HIPPOLYTE_1-2-3_TRINITY_DN185298_c2_g1	14.4406	6.54873	4.84075	5.26823	4.40609	11.6246	6.00009	12.5392	2.26606	9.91281	7.07064	11.2183	115.688	148.692	434.479	402.714	372.306	173.32	137.347	82.068	589.506	786.059	1237.88
HIPPOLYTE_1-2-3_TRINITY_DN185874_c3_g1	0	0	0	0	0	0	0	0	0.793612	0.777742	0	1.39973	1613	7683.24	23251.5	13536.4	19562.1	6232.75	2711.24	3136.88	11139.5	17112.4	15570.3	Cuticle protein AM1159;
HIPPOLYTE_1-2-3_TRINITY_DN185874_c3_g2	0	1.07115	0	0	0	0	0	1.06518	0	2.24895	0	0	304.263	1379.3	4905.22	2742.23	4601.88	1829.22	522.557	575.462	2682.26	4377.8	4019.08
HIPPOLYTE_1-2-3_TRINITY_DN186137_c1_g1	0	0	0	0	0	0	0	0	0	0	0	0	195.262	1166.63	3594.11	2446.58	1714.09	1151.29	370.594	325.026	2428.35	1678.09	257.647
HIPPOLYTE_1-2-3_TRINITY_DN186285_c5_g4	27.011	29.5043	14.5745	5.26433	12.3351	12.6355	25.9612	14.6109	9.05576	7.69879	0	5.26736	147.978	115.857	337.26	298.964	575.469	179.291	98.9427	68.9419	424.032	892.813	888.507
HIPPOLYTE_1-2-3_TRINITY_DN186465_c6_g1	0.730188	0	0	1.11457	0.734315	0	0	0	0	0.925917	0	0	331.741	76.6339	744.924	435.804	427.889	148.013	57.8291	28.6778	372.649	651.355	442.334
HIPPOLYTE_1-2-3_TRINITY_DN186773_c0_g1	0	0	0	0	0	0	0	0	0	0	0	0	402.389	826.258	3087.58	2335.85	2833.48	742.942	437.164	376.375	3599.14	5685.03	3435.49
HIPPOLYTE_1-2-3_TRINITY_DN186773_c1_g1	1.12256	0	0	0	0	0	0	0	0	0	1.02448	0	1310.56	2659.04	9010.89	7487.45	9749.7	2413.05	1308.43	1330.8	10793.5	19035.5	11641.3
HIPPOLYTE_1-2-3_TRINITY_DN186773_c1_g2	0	0	0	0	0	0	0	0	0	0	0	0	75.1171	206.287	705.601	558.092	642.482	161.327	103.432	92.5985	853.688	1257.22	815.387
HIPPOLYTE_1-2-3_TRINITY_DN186773_c1_g4	0	0	0	2.14792	6.05156	0	0	0	0	0	0	0	448.244	773.615	2236.8	1635.85	2303.59	852.445	440.07	493.44	2462.2	5088.13	2444.36
HIPPOLYTE_1-2-3_TRINITY_DN186773_c3_g1	0	0	0	0	0	0	0	0	0	0	1.16031	0	276.822	629.168	2103.08	1738.67	2028.36	627.636	302.897	294.287	2735.42	4187	2309.62
HIPPOLYTE_1-2-3_TRINITY_DN186773_c4_g1	0	0	0	0	0	0	0	0	0	0	0	0	127.342	268.893	872.72	643.209	860.603	309.091	137.98	150.86	970.292	1601.65	854.882	U-scoloptoxin(01)-Cw1a ;
HIPPOLYTE_1-2-3_TRINITY_DN187035_c11_g1	10.6216	15.307	3.64975	9.20936	12.3342	9.73483	8.9802	6.25813	12.4462	8.79263	10.6201	11.3197	102.316	95.0301	178.881	232.817	327.092	113.405	86.1643	48.6234	324.987	416.065	400.91
HIPPOLYTE_1-2-3_TRINITY_DN187170_c3_g2	0	0	0	0	0	0	0	0	0	0	0	1.57631	85.9477	71.8129	240.367	271.237	216.229	123.162	91.6719	33.9206	412.733	472.704	505.635
HIPPOLYTE_1-2-3_TRINITY_DN187170_c3_g4	1.90492	0	0	0	0	0	0	0	0	0	0	0	443.944	384.103	583.344	756.12	580.974	377.038	330.887	136.966	1309.76	1205.99	1034.24	Gonad-inhibiting hormone;
HIPPOLYTE_1-2-3_TRINITY_DN187300_c2_g1	0	0	0	0	0	0	0	0	0	0	0	0.655136	196.175	108.16	5647.36	2849.93	4751.3	440.683	86.0302	39.1986	5286.76	9852.42	7852.81	Rhodopsin;
HIPPOLYTE_1-2-3_TRINITY_DN187324_c1_g1	0	8.67558	0	1.32224	2.64564	3.80693	5.03954	0	0	2.21975	10.5553	6.5138	4734.29	9753.53	40118.2	28908.6	31731.8	7490.8	4049.28	1723.43	57339.6	100500	100853	Rhodopsin;
HIPPOLYTE_1-2-3_TRINITY_DN187324_c2_g1	0	0	0	0	0	0	0	0	0	2.2085	1.17654	0	130.405	277.357	689.05	336.917	568.019	145.352	79.729	24.4544	905.108	1874.47	1830.13	Rhodopsin;
HIPPOLYTE_1-2-3_TRINITY_DN187324_c2_g2	0	0	0	0	0	0	1.04341	0	0	0	0	0	197.048	465.65	1010.5	604.282	669.029	289.024	148.532	36.4545	1480.06	2377.29	2341.14	Rhodopsin;
HIPPOLYTE_1-2-3_TRINITY_DN187737_c6_g2	17.4079	27.3585	9.75932	3.94462	7.92813	9.75966	24.9163	16.6725	7.91462	8.78289	5.90412	12.8893	395.413	247.938	998.029	886.634	1016.91	339.417	213.766	168.328	1105.07	1662.94	1561.9
HIPPOLYTE_1-2-3_TRINITY_DN187811_c0_g1	1.3529	0	5.66826	0.934857	0	0	0	0.747392	2.41264	0	0	2.32521	81.7437	59.4745	2320.94	1491.97	2520.56	75.7119	36.7882	18.7918	1583.96	3314.95	4377.73
HIPPOLYTE_1-2-3_TRINITY_DN187811_c0_g2	1.83927	0	0	0	0	0.90343	0	0	0	1.13231	0	0	25.933	19.1381	773.599	407.65	601.109	21.3325	6.24235	5.06204	499.046	598.365	1118.69
HIPPOLYTE_1-2-3_TRINITY_DN187852_c3_g4	0	0	0	0	0	0	0	0	0	0	0	0	77.5268	32.5517	1680.16	790.497	1199.02	127.161	19.5555	15.0043	1598.1	2726.16	2948.29
HIPPOLYTE_1-2-3_TRINITY_DN188337_c0_g1	0	0	0	0.568103	0	0	0	0	0	0	0	2.14358	525.613	556.154	30399.6	20614	22788.7	2555.04	485.968	171.988	36997.9	60802.5	38437.7	Rhodopsin;
HIPPOLYTE_1-2-3_TRINITY_DN188433_c3_g1	2.14833	2.78412	4.49843	0	1.57429	2.86909	10.2097	0.962712	3.08938	6.00436	3.04014	2.02351	23.9401	33.4632	340.901	165.593	271.033	67.5944	33.5673	32.9017	519.529	556.841	636.708
HIPPOLYTE_1-2-3_TRINITY_DN188464_c1_g1	1.64942	4.66994	1.03874	1.1243	3.01121	3.19445	3.4113	4.36903	3.86785	0	6.04842	9.3029	54.5628	49.0634	204.486	285.955	298.288	59.3074	42.5495	20.0625	322.584	381.572	515.076
HIPPOLYTE_1-2-3_TRINITY_DN188804_c0_g10	0	0	0	0	0	0	0	0	0	0	0	2.48901	1271.25	2030.12	4463.39	3300.95	3538.83	1408.37	836.806	571.674	4059.58	3764.28	3812.48	Rhodopsin;
HIPPOLYTE_1-2-3_TRINITY_DN188804_c0_g2	0	0	0	0	0	0	0	0	0	0	0	0	49.4433	92.5241	393.641	251.593	290.147	54.3647	29.4235	8.01973	377.271	327.573	442.165	Rhodopsin;
HIPPOLYTE_1-2-3_TRINITY_DN188804_c0_g5	1.82361	0	0	0	0	0	0	0	0	0	0	0	1668.19	2352.4	7925.37	4785.49	7169.9	2185.78	848.245	605.458	7312.08	7779.11	6620.04	Rhodopsin;
HIPPOLYTE_1-2-3_TRINITY_DN188804_c0_g7	0	0	0	0	0	0	0	0	0	0	0	0	54.3303	56.6197	329.031	227.684	285.051	54.2431	20.5702	15.3533	440.061	883.573	801.168	Opsin Rh4;
HIPPOLYTE_1-2-3_TRINITY_DN188804_c0_g9	0	0	0	0	0	0	0	0	0	0	0	0	994.242	1244.11	5723.28	3572.36	4517.75	1166.89	501.063	349.261	4571.01	5798.51	4767.77	Rhodopsin;
HIPPOLYTE_1-2-3_TRINITY_DN188804_c18_g1	0	0	0	0	0	0	0	0	0	0	0	0	45.8596	88.4407	493.485	196.095	336.636	94.6331	42.2969	5.65139	357.594	691.266	426.738
HIPPOLYTE_1-2-3_TRINITY_DN188804_c19_g1	0	0	0	0	0	0	0	0	0	0	0	0	195.044	302.473	786.821	364.699	573.162	240.335	100.513	50.4073	744.063	638.239	499.484	Opsin, ultraviolet-sensitive;
HIPPOLYTE_1-2-3_TRINITY_DN188804_c1_g1	0	0	0	0.98873	0	0	0	0	0	0	0	7.4045	4460.7	5550.12	30936.3	25182.7	29256.3	5525.67	3230.41	1252.04	55205.1	81173.1	77688.9	Rhodopsin;
HIPPOLYTE_1-2-3_TRINITY_DN188804_c1_g3	0	0	0	0	0	0	0	0	0	0	0	1.30816	747.409	832.976	7534.13	6381.08	7931.15	1039.93	504.004	220.03	13267.8	20876.5	19677.7	Rhodopsin;
HIPPOLYTE_1-2-3_TRINITY_DN188804_c2_g2	0	1.0883	0	1.31939	0	0.961022	0	0	0	0	0	0.737058	8262.07	13558.2	38812.1	27155.4	29495.8	9733.81	4752.97	3147.49	34873.5	35995.6	32699.4	Rhodopsin;
HIPPOLYTE_1-2-3_TRINITY_DN188804_c2_g3	0	0	0.723821	1.59585	0	0	0	0	0	0	0	10.7715	4911.41	4655.4	33955.7	26221.6	33838	5168.08	2497.3	1118.9	55083.3	89490.1	85709.1	Opsin, blue-sensitive;
HIPPOLYTE_1-2-3_TRINITY_DN188804_c2_g4	0	0	0	0	0	0	0	0	0	0	0	0	294.287	394.032	1115.9	757.684	853.858	308.686	147.386	112.569	971.313	1107.8	1041.99	Rhodopsin;
HIPPOLYTE_1-2-3_TRINITY_DN188804_c2_g5	0	0	0	0	0	0	0	0	0	2.23441	0	2.10692	1555.47	1317.39	12138.8	9141.06	14474.1	2264.16	733.966	339.09	22200.4	32889.6	32937.6
HIPPOLYTE_1-2-3_TRINITY_DN188804_c5_g1	0	0	0	0	0	0	0	0	0	0	0	0	128.912	146.113	711.874	417.887	639.91	157.663	55.7684	34.11	668.091	757.422	733.317
HIPPOLYTE_1-2-3_TRINITY_DN188874_c0_g1	5.81712	1.09591	0	1.31365	0	3.91993	1.98959	4.16169	0	7.67128	2.36424	11.4595	184.049	105.867	471.263	466.527	548.324	170.58	119.73	100.933	484.633	533.35	624.13	Aristaless-related homeobox protein;
HIPPOLYTE_1-2-3_TRINITY_DN188996_c7_g4	8.50991	9.71805	11.7316	3.97779	8.82426	9.40988	11.1444	9.50583	2.28252	0	7.01559	1.41618	90.3234	60.7326	166.693	162.068	306.038	101.961	55.8967	18.9802	338.618	542.228	499.274
HIPPOLYTE_1-2-3_TRINITY_DN190087_c0_g1	0.732065	0.845856	0	0	0	0	0	0	1.84836	2.71173	0	3.01411	3880.02	7240.08	31028.8	20076.6	28179.6	7325.19	2864.77	1633.22	37978.8	66536.9	67274.1	Phosrestin-1;
HIPPOLYTE_1-2-3_TRINITY_DN190300_c0_g1	23.2068	22.0766	12.1831	15.9363	8.00424	7.86379	26.8973	5.26407	10.1482	4.38093	0	9.78441	773.358	551.896	2523.27	2489.07	1789.19	869.121	451.906	587.498	2294.87	2219.96	2298.85
HIPPOLYTE_1-2-3_TRINITY_DN190679_c4_g1	0	5.08718	0	0	0.563307	0	2.76378	0.680975	0	1.43523	4.34556	0	2874.01	4779.76	15480.7	13989.6	12602.6	3218.87	2848.7	2664.98	10599.8	18226.7	19270.5
HIPPOLYTE_1-2-3_TRINITY_DN190976_c0_g1	0	0	0	0	0	0	0	0	0	0	0	0	98.7272	126.656	209.007	335.894	393.195	138.297	95.1623	153.676	741.891	766.745	1090.98	Crustacean hyperglycemic hormones;
HIPPOLYTE_1-2-3_TRINITY_DN191573_c6_g1	2.2935	4.42804	0	1.55985	2.18826	0	0.70996	4.85304	0	0	1.68513	0	265.887	251.454	1204.52	893.492	1020.96	294.431	160.916	109.598	1551.8	2076.75	2341.42	Contactin-3;
HIPPOLYTE_1-2-3_TRINITY_DN191966_c3_g1	0	2.18741	1.21776	0	1.76195	0.974361	0.997393	2.08534	5.65593	0	0	5.2913	14.5161	74.1417	553.571	330.101	301.231	162.55	59.0515	30.7797	941.676	707.886	455.773
HIPPOLYTE_1-2-3_TRINITY_DN192342_c2_g4	24.3665	21.2047	26.018	25.4652	23.0352	22.706	28.9476	19.1695	7.66377	21.2585	21.7349	13.9748	113.401	137.438	197.812	260.17	380.888	178.361	95.8874	51.7071	411.638	605.06	496.949
HIPPOLYTE_1-2-3_TRINITY_DN192386_c0_g1	0.803263	3.88787	0	2.28179	0	0	3.49719	0	1.96358	3.8457	2.99591	1.7716	6240.69	13350.1	43267.2	32754.2	39587.7	16349.9	5299.81	3148.11	56970.1	85858.2	100461	Arrestin homolog;
HIPPOLYTE_1-2-3_TRINITY_DN192681_c3_g1	0	0.611179	0	0	3.57767	5.03863	0	0	0	0	0.665704	1.57727	2051.92	3652.47	12097.2	16199.3	11188.4	3211.3	2852.61	2762.84	13166.5	16187.3	18331.7	U-scoloptoxin(01)-Er1a ;
HIPPOLYTE_1-2-3_TRINITY_DN193826_c1_g1	0.552741	6.50173	2.84519	7.87159	0	0.305465	0.689447	0	0	2.8849	0.708665	7.51959	6028.63	2960.45	92807.2	49527.9	89283.3	14087.7	2670.34	1201.31	82914	136229	91710.1	Rhodopsin;
HIPPOLYTE_1-2-3_TRINITY_DN194015_c3_g1	2.89345	5.40903	0	1.28644	5.15489	4.67105	5.10469	4.30697	3.32149	4.31274	1.26529	10.153	60.3855	72.4675	273.35	223.903	299.439	80.5577	65.4905	30.8291	346.341	458.157	605.061
HIPPOLYTE_1-2-3_TRINITY_DN194259_c0_g1	0	1.07226	0	0	0.884039	0	0	0	0	0	0	0	3327.1	4715.96	19389.2	11700.5	13895.8	3733.06	1620.11	1157.81	15498.8	17834.6	16301.4	Rhodopsin;
HIPPOLYTE_1-2-3_TRINITY_DN194259_c1_g1	0	0	0	22.1624	6.4113	9.96859	1.59215	0	2.67413	2.63029	0.935503	12.1904	12509	17482.5	240784	127940	161133	19542.8	9989.77	1831.73	364082	676585	675266	Rhodopsin;
HIPPOLYTE_1-2-3_TRINITY_DN194652_c1_g1	1.44417	2.70661	0	3.12194	0	0	0	0	0.643615	8.78378	3.73796	1.36851	3702.78	5355.74	35269.4	25736.2	36716.6	7172.28	2130.4	1246.04	49898.3	92218.5	89586.9
HIPPOLYTE_1-2-3_TRINITY_DN195144_c0_g1	0	0	0	1.11739	0	0	0	0	0	3.71127	2.16034	0	502.872	901.216	12517.3	8635.72	11204.2	1694.53	428.385	266.283	17692.8	30063.2	33635.2
HIPPOLYTE_1-2-3_TRINITY_DN195205_c1_g1	0	0	0	0	0.880892	0	0	0	0	0	0	0	556.115	1162.14	2039.12	1463.1	1625.81	925.039	330.262	160.214	3090.75	4960.19	5561.17	Rhodopsin;
HIPPOLYTE_1-2-3_TRINITY_DN195205_c1_g3	0	0	0	1.32815	0	0	0	0	0	0	0	0	454.739	613.486	6235.33	3770.91	4826.76	1307.58	454.28	202.865	12305.7	34023.9	29701.5	Rhodopsin;
HIPPOLYTE_1-2-3_TRINITY_DN195205_c2_g1	0	1.72428	0	0	0	0	0	0	0	0	0.93971	0	694.853	1845.65	2582.04	687.672	1565.23	1873.98	465.867	197.546	563.849	581.262	483.145	Rhodopsin;
HIPPOLYTE_1-2-3_TRINITY_DN195472_c10_g3	27.9382	13.9078	13.7245	9.3459	17.6948	22.0731	14.3542	12.8002	6.89229	12.3832	15.1102	23.6668	101.891	69.9607	282.827	271.95	460.254	80.6981	61.6785	35.0859	771.125	1155.15	1043.79
HIPPOLYTE_1-2-3_TRINITY_DN195535_c1_g1	1.08507	0.633288	0	0	0	0	0.647279	0	0	0.686011	0	7.75437	1063.23	1093.23	27376.4	17765.7	21497.8	3626.97	760.429	239.155	30211.7	47270.8	31593.4	Rhodopsin;
HIPPOLYTE_1-2-3_TRINITY_DN195578_c5_g1	22.684	18.0604	7.11597	5.22532	7.74669	15.1344	11.801	10.1641	5.7772	17.0557	15.2708	20.7966	223.416	117.85	716.252	663.358	922.11	191.146	93.5304	44.7775	1027.35	1591.5	1410.75
HIPPOLYTE_1-2-3_TRINITY_DN195884_c1_g1	0	0	0	0	0	0	0	0	0	0	0	1.2348	1920.57	1667.93	16715	12302.8	18088.9	2077.27	851.996	362.28	29124.6	48667.9	44672.7	Opsin, blue-sensitive;
HIPPOLYTE_1-2-3_TRINITY_DN196161_c2_g1	0	4.35983	0	0	3.52547	0	0	0	1.13419	4.4129	5.88626	0	867.796	966.709	4247.55	4175.68	5338.62	1348.42	673.568	339.521	8728.4	12029.5	12026.5	Opsin Rh4;
HIPPOLYTE_1-2-3_TRINITY_DN196161_c2_g2	0	0	0	0	0	0	0	0	0	0	0	0	1322.81	1672.15	4855.07	4556.72	6319.34	2029.03	1236.24	544.219	11384.3	12256.5	12475.4	Opsin, ultraviolet-sensitive;
HIPPOLYTE_1-2-3_TRINITY_DN196161_c2_g4	0	0	0	0	0	0	0	0	0	0	0	0	60.4255	64.9846	251.057	220.674	315.948	102.93	35.7616	19.3849	518.189	869.208	777.523
HIPPOLYTE_1-2-3_TRINITY_DN196468_c2_g1	5.10913	0	0	0	0	0	0.917821	0	0	0	0	0	258.121	247.314	390.471	343.915	422.203	197.26	174.77	232.486	514.794	702.588	601.736	Pigment-dispersing hormone type 2;
HIPPOLYTE_1-2-3_TRINITY_DN196468_c2_g2	0.236102	0	0	0	0	0	0.548529	0	0	0	0	0	387.125	441.588	1645.26	1609.67	1330.43	331.753	234.037	256.393	829.789	1189.05	1568.51
HIPPOLYTE_1-2-3_TRINITY_DN196468_c2_g3	0	0	0	1.37511	0	0	2.24397	0	0	0	0	0	197.106	164.522	627.196	649.708	532.296	149.564	138.967	125.397	359.192	372.485	430.789	Pigment-dispersing hormone type 2;
HIPPOLYTE_1-2-3_TRINITY_DN196855_c0_g1	0	0	0	0	0	0	0	0	0	2.81531	0	0.50315	1892.25	3024.15	8330.85	5012.01	9807.28	3915.73	283.432	643.511	9168.04	15267.6	13425.7
HIPPOLYTE_1-2-3_TRINITY_DN197169_c11_g1	0	0	0	0	0	1.9287	0	0	0	0	0	0	46.7416	20.5258	574.389	405.793	473.353	96.9601	28.5681	9.34826	614.658	1007.35	890.967
HIPPOLYTE_1-2-3_TRINITY_DN197516_c1_g1	0	17.2672	0	1.90852	0	0	0.731184	0	0	3.2163	1.67134	7.48643	4584.41	3610.3	73846.9	49375.5	46158.9	13406.3	3525.65	1282.62	59369.6	73788.5	72331.9	Rhodopsin;
HIPPOLYTE_1-2-3_TRINITY_DN197782_c7_g1	0.867508	0	2.14717	0	0	0	0	0	0	0	0	0	871.42	461.894	2051.46	1020.2	789.673	518.521	420.556	171.7	553.499	532.762	769.685
HIPPOLYTE_1-2-3_TRINITY_DN197916_c0_g1	11.3589	2.45643	10.0545	29.3693	23.6285	11.6986	12.318	7.70033	8.61184	21.6795	20.1316	20.0903	190.96	108.084	1081.7	988.189	948.485	214.417	82.8205	29.6187	1156.06	1864.56	1988.25
HIPPOLYTE_1-2-3_TRINITY_DN198079_c1_g1	1.8142	2.10705	0	2.71072	0	0	0	0	1.16904	1.13604	0	3.147	1400.51	2907.21	15550.9	12868.9	13880.4	2958.23	1422.42	658.843	22277.6	35690.3	33323.2	Phosrestin-1;
HIPPOLYTE_1-2-3_TRINITY_DN198079_c2_g1	0	2.30479	0	0	1.09147	0	0	3.25587	0	0	5.86478	2.87698	2004.36	5360.82	25818	23006.8	21834.5	6058.58	3346.38	1314	37914.8	53716.6	43645.3	Phosrestin-1;
HIPPOLYTE_1-2-3_TRINITY_DN198079_c2_g2	1.78456	2.59224	0	11.2092	4.41228	0	1.8924	0	0	17.0463	11.6041	9.02078	19564.4	37626.1	177721	133980	162713	41946.2	25469.1	9126.73	249901	392812	410172	Phosrestin-1;
HIPPOLYTE_1-2-3_TRINITY_DN198079_c2_g3	0	3.1298	0	0	0	0.859856	0	0	0	2.26069	0	0	1134.62	1352.55	12968.1	7410.58	10377.6	2775.39	846.085	142.22	15525.2	27496.4	39754
HIPPOLYTE_1-2-3_TRINITY_DN198132_c7_g2	3.8404	7.62792	10.8401	7.91012	3.5256	7.71545	3.00599	8.3731	5.67188	7.72464	4.70805	4.45111	132.807	98.8896	569.692	548.932	709.182	175.381	114.585	29.322	413.056	680.689	703.871
HIPPOLYTE_1-2-3_TRINITY_DN198175_c5_g1	0	0	0	0	0	0	0	0	0	0	0	0	407.005	490.934	2888.03	2176.34	3195.88	462.204	345.41	571.167	3515.53	5158.23	3299.38
HIPPOLYTE_1-2-3_TRINITY_DN198175_c5_g2	0	0	0	0	0	0	0	0	0	0	0	0	314.336	283.05	911.016	579.813	614.916	242.918	217.271	373	761.054	993.156	636.491
HIPPOLYTE_1-2-3_TRINITY_DN198175_c5_g3	0	0	0	0	0	0	0	0	0	0	0	0	86.6473	98.8711	483.961	325.342	518.876	72.6696	64.2537	108.619	437.156	757.948	410.658
HIPPOLYTE_1-2-3_TRINITY_DN198175_c5_g5	0	0	0	0	0	0	0	0	0	0	1.14381	0.612278	96.4997	105.161	591.558	475.4	688.78	70.2104	81.1528	113.975	809.771	945.755	605.467
HIPPOLYTE_1-2-3_TRINITY_DN198175_c5_g6	0	0	0	0	0	0	0	0	0	0	0	0	504.581	561.951	2719.74	1705.91	2371.38	455.153	407.064	567.101	2917.01	3810.17	2604.58
HIPPOLYTE_1-2-3_TRINITY_DN198175_c5_g7	0	0	0	0	0	0	0	0	0	0	0	0	83.5798	84.5392	478.294	471.849	408.992	95.1992	61.604	117.769	448.076	729.606	492.351
HIPPOLYTE_1-2-3_TRINITY_DN198175_c5_g8	0	0	0	0	0	0	0	0	1.28024	0	0	0	329.875	325.661	1759.48	1079.31	1615.67	298.882	236.032	431.082	1935.04	2593.51	1588.83
HIPPOLYTE_1-2-3_TRINITY_DN198175_c6_g1	0.535664	0	0	0	0	0	0	0	0	0	0	9.94764	2138.35	2545.12	15216.8	11241.1	13724	2536.07	1977.86	2937.69	18428.1	23868.7	16115.8
HIPPOLYTE_1-2-3_TRINITY_DN198175_c6_g2	0	0	0	0	0	0	0	0	0	0	0	0	375.283	553.841	2505.29	1857.55	1800.51	509.352	402.878	559.496	2397.59	3102.82	2154.67
HIPPOLYTE_1-2-3_TRINITY_DN198175_c6_g3	0	0	0	0	0	0	0	0	1.1313	0	4.72076	1.51082	1824.78	1877.61	13222.1	8283.09	14350.8	1877.41	1279.61	2273.27	14976.6	23347.6	15540.9
HIPPOLYTE_1-2-3_TRINITY_DN198175_c6_g4	0	0.819569	0	0	0	0	1.55992	0.812025	0	0	0	3.18605	2183.02	3579.44	11154.7	11044.8	8311.85	3780.71	3415.79	5196.22	14386.5	14263.9	7732.47
HIPPOLYTE_1-2-3_TRINITY_DN198175_c6_g7	0	0	0	0	0	0	0	0	0	0	0	0	141.327	167.177	687.128	545.087	496.288	120.167	115.742	201.629	703.119	847.54	546.679
HIPPOLYTE_1-2-3_TRINITY_DN198218_c2_g2	20.7576	21.6361	10.0002	14.2527	12.0557	24.0576	13.24	13.4261	21.1046	21.017	17.6264	9.75772	218.734	73.6746	359.299	308.534	425.642	106.901	47.5282	72.9512	356.722	581.023	397.116
HIPPOLYTE_1-2-3_TRINITY_DN198405_c0_g1	0	0	0	0	0	0	0	0	0	0	0	0	390.575	485.128	4137.94	2648.34	2498.95	928.574	206.452	100.684	3441.3	5497.4	4269.24	Rhodopsin;
HIPPOLYTE_1-2-3_TRINITY_DN198405_c1_g1	0	0	0	0	0	0	0	0	0	0	1.07924	1.26399	239.304	261.773	3117.09	1907.96	2211.39	518.824	144.739	54.5241	3517.59	5860.42	3255.21	Rhodopsin;
HIPPOLYTE_1-2-3_TRINITY_DN198512_c0_g1	0	0	0	0	0	0	0	0	0	0	0	0	19.9397	43.7398	308.052	219.608	126.411	36.7401	16.196	17.4065	412.824	612.566	772.008	Rhodopsin;
HIPPOLYTE_1-2-3_TRINITY_DN198512_c1_g1	0	0	0	0	0	0	0	0	0	0	0	0	186.78	325.882	1287.91	898.585	678.912	217.897	117.11	53.5716	1177.4	2631.78	2823.25	Rhodopsin;
HIPPOLYTE_1-2-3_TRINITY_DN198512_c1_g2	0	0	0	0	0	0	1.16725	0	0	0	0	0	23.0216	89.4201	503.822	399.992	403.587	76.7026	34.2658	8.10117	614.17	881.132	768.235	Rhodopsin;
HIPPOLYTE_1-2-3_TRINITY_DN198512_c1_g5	0	0	0	0	0	0	0	0	0	0	11.6341	0	605.853	1074.69	6123	4777.8	4875.21	993.332	525.593	224.286	8649.15	14552.4	16750.3	Rhodopsin;
HIPPOLYTE_1-2-3_TRINITY_DN198512_c1_g6	0.910589	1.05581	0	0	0	0	0	0	0	0	1.15246	0	327.044	620.109	3895.1	2752.75	2866.98	507.195	272.996	107.173	4974.11	9425.96	10120.1	Rhodopsin;
HIPPOLYTE_1-2-3_TRINITY_DN198512_c2_g1	2.56651	6.78968	0	2.34112	0.783177	0	7.11055	0	0	1.9579	29.3236	11.9604	4001.93	10829.7	35991.4	28536.5	25202.1	9196.9	4813.95	1836.59	52122.7	79974.5	99384.4	Rhodopsin;
HIPPOLYTE_1-2-3_TRINITY_DN198512_c2_g2	0	0	0	0	0	0	0	0	0	0	0	0	129.378	200.485	825.246	483.559	456.503	147.455	84.0988	33.2148	991.08	1784.11	2457.46
HIPPOLYTE_1-2-3_TRINITY_DN198512_c2_g3	0	0	0	0	1.42378	0	1.20331	0	0	3.06986	0.915417	0.998838	685.315	1449.47	7033.32	5202.75	6142.21	1216.21	691.023	244.174	11237.7	19708.8	16934.6	Rhodopsin;
HIPPOLYTE_1-2-3_TRINITY_DN198512_c2_g5	0.910589	0	0	0	0.892005	0	1.04974	0	0	0	2.30492	2.54223	871.881	1698.09	12290.3	8011.11	8527.18	1478.92	708.237	301.955	14017.5	26403.3	30571.4	Rhodopsin;
HIPPOLYTE_1-2-3_TRINITY_DN198512_c3_g1	0	1.04226	0	0	0	0	0	0	0	0	1.13539	2.39912	194.42	404.611	1491.97	1145.99	1022.62	234.817	137.372	71.7532	1811.78	3384.9	3794.13	Rhodopsin, long-wavelength;
HIPPOLYTE_1-2-3_TRINITY_DN198512_c4_g1	0	0	0	0	0	1.67528	0	0	0	2.22293	0	0	85.8752	228.174	1235.92	960.36	761.354	174.986	76.9536	34.7522	1444.57	2440.61	2726.02	Rhodopsin, long-wavelength;
HIPPOLYTE_1-2-3_TRINITY_DN198512_c7_g1	0	0	0	0	0	0	0	0	0	0	0	0	73.3267	147.37	1025.02	715.136	797.335	164.93	88.2718	38.1983	1265.47	2598.21	2599.3	Rhodopsin;
HIPPOLYTE_1-2-3_TRINITY_DN198512_c8_g1	0	0	0	0	0	0	0	0	0	0	0	0	30.684	32.9614	358.091	204.632	328.344	32.4515	34.3483	9.55301	450.35	793.675	737.738	Rhodopsin;
HIPPOLYTE_1-2-3_TRINITY_DN198642_c1_g2	23.9713	19.14	14.6222	17.4506	14.1994	7.25348	10.3505	17.2024	6.92967	12.4434	17.3686	3.94116	159.051	70.0795	223.753	270.842	398.014	102.178	49.7186	37.8915	310.909	378.697	521.4
HIPPOLYTE_1-2-3_TRINITY_DN198721_c3_g1	0	0	0	1.06315	0	0	0	0	0	0	0	0	43.0445	30.4975	213.231	125.07	209.827	33.7119	32.7915	63.5301	635.19	887.998	706.108
HIPPOLYTE_1-2-3_TRINITY_DN198930_c2_g1	14.3218	4.54413	5.84084	8.40245	14.7329	11.6839	6.37004	9.71309	6.3224	8.33944	1.88574	14.512	222.349	66.4969	1168.8	1186.97	1048.37	194.752	61.3162	24.8151	1283.87	3207.93	3152.81
HIPPOLYTE_1-2-3_TRINITY_DN199609_c5_g1	0	0	0	0	0	0	1.00824	0	0	0	0	0	171.442	194.516	4668.32	2052	2320	270.423	147.839	212.539	1591.7	1385.84	804.366
HIPPOLYTE_1-2-3_TRINITY_DN199609_c5_g2	0	0	0	0	0	0	0	0	0	0	0	0	158.275	137.642	3696.14	1483.43	2057.4	187.574	90.0371	100.96	1251.9	1339.97	625.306
HIPPOLYTE_1-2-3_TRINITY_DN199609_c5_g4	0	0	0	0	0	6.86035	0	0	0	0	0	0	768.277	1104.46	15605	8681.17	7843.89	1344.69	851.554	1158.33	5920.84	4121.68	2234.86	Cuticle protein 18.6, isoform A;
HIPPOLYTE_1-2-3_TRINITY_DN199874_c2_g5	0	0	0	0	0	0	0	0	0	0	0	0.696136	165.455	82.0699	4492.81	2113.59	3427.52	274.157	76.4195	23.1447	3480.87	5986.03	4208.22	Rhodopsin;
HIPPOLYTE_1-2-3_TRINITY_DN199874_c3_g1	0	0	0	0	0	0	0	0	0	1.1357	0	0.616188	225.322	335.256	8118.1	5456.68	10646.1	949.1	216.302	32.7127	12848.3	17200.7	9074.6	Rhodopsin;
HIPPOLYTE_1-2-3_TRINITY_DN199874_c3_g3	0	1.04069	0	0	2.72194	0	0	0	0	0	1.13136	0	651.256	636.134	11402.3	6921.99	8236.41	1623.36	336.485	110.036	10385.5	16880.3	12702.3	Rhodopsin;
HIPPOLYTE_1-2-3_TRINITY_DN199874_c3_g8	0	0	0	0	0	0	0	0	0	0	0	0	96.3102	82.2653	1512.77	779.205	1536.18	235.71	62.9557	18.5313	1748.17	2981.12	1482.92	Rhodopsin;
HIPPOLYTE_1-2-3_TRINITY_DN199874_c4_g1	0.359115	18.9398	5.24441	23.3274	7.87734	1.40917	4.40652	3.39658	0	14.6181	23.3618	20.6318	25905.6	24638.3	472041	292020	430739	71689.3	16204.6	5859.18	526626	807418	490557	Rhodopsin;
HIPPOLYTE_1-2-3_TRINITY_DN199874_c4_g2	0	0	0	0	2.50344	0	1.16439	0	0	0	1.17729	3.35146	1302.96	810.607	18159.6	9473.56	13259.3	2115.46	565.034	192.502	14767.3	24710.2	17620.1	Rhodopsin;
HIPPOLYTE_1-2-3_TRINITY_DN199874_c4_g3	0	1.19848	0	10.6468	0	0	0.59448	0	0	3.21936	3.26991	4.86157	2941.22	2962.97	50720.9	34132.1	35433	9464.38	2374.68	914.871	46767.9	68050.7	53866.1	Rhodopsin;
HIPPOLYTE_1-2-3_TRINITY_DN200110_c1_g1	21.2344	21.5876	26.2394	9.91667	1.80162	4.92293	11.3118	15.182	1.15501	13.9096	1.20923	19.9873	258.194	201.37	919.5	649.363	862.751	301.289	207.919	173.008	714.226	924.647	740.394	Paired box protein Pax-6;
HIPPOLYTE_1-2-3_TRINITY_DN200212_c10_g3	0.868169	0	0	0	0	0	0	0	0	0	0	0	11.5108	18.6616	628.17	186.271	307.495	20.454	10.6605	2.70039	522.397	851.416	848.205
HIPPOLYTE_1-2-3_TRINITY_DN200312_c1_g1	0	0.997093	1.00962	13.0998	0	0	0	0	0	1.08032	2.17383	1.15064	7201.14	17621.2	101531	57715.5	69266.6	15928.9	8681.97	1958	169547	281918	241882	Rhodopsin;
HIPPOLYTE_1-2-3_TRINITY_DN200312_c3_g1	0	0	0	0	0	0	0	0	0	0	0	0	36.8884	85.2176	529.9	468.448	396.705	145.995	72.3582	41.8601	1814.68	4298.7	4292.83	Rhodopsin;
HIPPOLYTE_1-2-3_TRINITY_DN200312_c3_g2	0	0	0	0	0	0.573992	0	0	0	0	0	0	43.8899	90.5167	642.802	574.752	542.715	148.353	70.0822	15.1616	2054.94	5595.93	5197.72	Ceropsin;
HIPPOLYTE_1-2-3_TRINITY_DN200312_c3_g3	0	0	1.12913	0	0	0	0	0	0	2.25997	0	0	292.351	625.556	3400.66	2612.93	3190.02	1058.19	399.462	290.811	8224.53	22398.7	19303	Rhodopsin;
HIPPOLYTE_1-2-3_TRINITY_DN200312_c3_g5	0	0	0	0	0	0	0	0	0	0	0	0	7.33499	28.1168	77.0242	94.868	90.4917	38.4046	13.2442	11.1604	370.516	1030.75	1397.39
HIPPOLYTE_1-2-3_TRINITY_DN200358_c0_g1	0	0.753996	0	0	0	0	0.710176	0	1.59839	0	0.816904	0	874.581	4748.35	7607.3	5884.74	8589.78	3993.74	1707.1	2763.56	7596.41	10582.9	7331.49
HIPPOLYTE_1-2-3_TRINITY_DN200358_c0_g3	0	0	0	0	0	0	0	0	0	0	0	0	611.881	2936.66	6570.13	5002.29	9994.53	2860.18	1138.37	1705.7	6259.2	10153.8	7082.94
HIPPOLYTE_1-2-3_TRINITY_DN200358_c0_g4	0	0	0	0	0	0	0	0	0	0	0	0	161.336	638.06	1679.94	1356.61	2653.38	559.242	306.487	398.237	1599.03	2726.26	1993.67
HIPPOLYTE_1-2-3_TRINITY_DN200358_c0_g5	0	0	0	0	0	0	0	0	0	0	0	0	39.6847	174.855	411.975	310.33	495.948	140.159	60.3558	77.5241	374.466	735.42	480.672
HIPPOLYTE_1-2-3_TRINITY_DN200358_c0_g6	0	0	0	0	0	0	0	0	0	0	0	0	81.6483	378.823	697.958	514.235	1008.58	258.44	137.633	269.762	627.896	1035.26	790.274
HIPPOLYTE_1-2-3_TRINITY_DN200358_c0_g7	0	0	0	0	0	0	0	0	0	0	0	0	139.267	643.937	989.121	844.242	1223.12	537.159	235.581	320.071	935.024	1544.07	975.651
HIPPOLYTE_1-2-3_TRINITY_DN200358_c2_g1	0	0	0	0	0	0	0	0	0	0	0	0	396.94	1408.1	2322.46	1641.04	2859.51	1447.89	580.5	919.848	2104.97	3390.78	2690.89
HIPPOLYTE_1-2-3_TRINITY_DN200358_c2_g2	0	0	0	0	0	0	0	0	0	0	0.885746	0.966464	581.256	3336.75	6222.18	5489.38	8751.91	2869.6	1381.94	1953.01	7874.75	10446.1	7528.26
HIPPOLYTE_1-2-3_TRINITY_DN200358_c2_g3	0	1.03864	0	0	0	0	0	0	0	0	0	0	100.617	491.12	960.546	578.095	1112.53	396.585	162.175	267.722	771.297	1307.6	901.506
HIPPOLYTE_1-2-3_TRINITY_DN200358_c3_g1	0	0	0	0	0	0	1.14336	0	0	0	0	0	85.2246	395.188	846.597	654.924	1127.97	321.092	131.274	200.493	723.687	1275.33	906.902
HIPPOLYTE_1-2-3_TRINITY_DN200358_c5_g1	0	0	0	0	0	0	0	0	0	0	0	0	61.1511	263.629	777.101	471.592	992.781	235.884	102.466	153.278	804.309	1239.93	870.797
HIPPOLYTE_1-2-3_TRINITY_DN201165_c3_g1	17.1947	8.75957	12.4692	5.68814	28.2907	14.1374	15.1896	19.6262	17.3695	13.1174	19.2225	17.0653	134.561	100.776	192.949	556.39	698.606	349.935	96.6657	153.604	1979.18	2942.47	1820.1
HIPPOLYTE_1-2-3_TRINITY_DN201272_c0_g3	0	1.48009	0	0	0.396227	0	0	2.45634	5.37443	0	2.06994	2.67682	407.714	639.274	11509.6	17072.6	14669.3	6005.35	2620	1343.25	21380.9	35930.6	29216.9
HIPPOLYTE_1-2-3_TRINITY_DN201318_c0_g1	0.724806	0	0	0.997574	0	0	0	0	0	2.50652	0	1.67442	216.795	172.366	1190.96	780.176	858.896	267.214	205.764	229.792	1703.95	2326.82	2073.62
HIPPOLYTE_1-2-3_TRINITY_DN201401_c1_g1	3.02281	4.2785	0	1.39627	0.931617	0.874502	0	0	0	0	0	0.668764	58.5357	31.5763	170.421	167.846	319.001	59.5457	17.9415	6.80531	453.876	550.657	521.023
HIPPOLYTE_1-2-3_TRINITY_DN201633_c4_g1	26.7864	20.6608	26.3326	17.1606	11.4611	14.3823	22.1012	15.733	0	5.53156	18.8025	7.33908	120.203	89.0625	311.845	274.04	403.432	121.467	76.3344	44.1212	407.159	454.769	493.919
HIPPOLYTE_1-2-3_TRINITY_DN201937_c4_g1	0	0	0	0	0	0	0	0	0	0	0	0	16.2583	15.2193	92.0186	168.089	157.383	19.2199	12.489	9.58814	612.859	508.983	727.341
HIPPOLYTE_1-2-3_TRINITY_DN202043_c4_g1	25.0769	9.83369	18.212	5.26469	14.9786	8.74492	8.98782	8.35003	5.66034	8.7998	10.6147	15.7931	69.3983	40.0642	216.511	226.748	253.29	67.7065	59.8936	17.0356	307.615	390.348	304.879
HIPPOLYTE_1-2-3_TRINITY_DN202556_c4_g1	0.895764	2.05937	0	0	0	0	0	1.82668	0	1.92851	0.997843	12.8501	4362.68	6848.45	49896.7	22782.7	28906.4	7440.5	2795.37	724.417	60369.8	107424	110919	Rhodopsin;
HIPPOLYTE_1-2-3_TRINITY_DN202666_c1_g6	0	0	0	0	0	0	0	0	0	0	0	0	2.64572	18.1923	255.002	179.769	138.665	11.8299	6.72423	1.76616	483.099	589.227	840.105	Rhodopsin;
HIPPOLYTE_1-2-3_TRINITY_DN202666_c2_g1	0	0	0	0	0.951789	0	0	0	0	0	0	0	45.8892	98.8112	346.507	186.169	210.9	35.075	17.374	2.81547	517.056	1077.9	1168.24
HIPPOLYTE_1-2-3_TRINITY_DN202666_c2_g3	0	0	0	0	0	0.772882	0	0	4.10301	0	0	0.648872	354.23	469.268	6867.11	3165.62	3598.29	457.379	189.808	50.4922	12016.2	20851.8	20878.1
HIPPOLYTE_1-2-3_TRINITY_DN202907_c0_g1	1.8803	1.29716	7.1013	1.03178	0	4.18552	0	5.12095	0.61829	3.09029	0	0.266739	513.284	152.36	848.628	614.387	394.787	298.11	136.301	87.4173	395.221	898.903	859.928
HIPPOLYTE_1-2-3_TRINITY_DN203270_c0_g1	1.89761	7.57434	1.18002	3.97239	1.76427	0.94612	4.04234	5.27015	4.55904	15.5772	7.02543	7.15604	15432.2	12122.9	275902	157864	231066	36580.7	9086.07	3499.54	248999	359736	266973	Rhodopsin;
HIPPOLYTE_1-2-3_TRINITY_DN203410_c1_g3	5.53427	8.25771	10.6164	11.1339	5.81029	4.71394	6.0855	4.10731	7.18392	15.5581	1.12096	2.80728	73.9873	132.281	292.636	238.661	334.87	63.7121	109.657	120.615	873.161	1031.3	530.087
HIPPOLYTE_1-2-3_TRINITY_DN203529_c0_g3	9.4491	15.1109	16.4062	0	1.76495	6.58019	11.15	9.50916	2.28318	6.69448	1.16892	1.41328	255.856	310.318	181.618	354.738	336.641	390.108	295.667	236.142	516.003	659.541	604.186	Red pigment-concentrating hormone ;
HIPPOLYTE_1-2-3_TRINITY_DN204322_c1_g1	0	0	0	11.8854	0	0	0	0	0	0	0	0	440.531	800.412	2006.79	591.463	1186.89	764.008	317.056	79.1732	702.922	722.48	280.973	Rhodopsin;
HIPPOLYTE_1-2-3_TRINITY_DN204322_c1_g2	0	0	0	0	0	0	0	0	0	0	0	0.628888	356.794	337.933	13978.6	9049.03	15814.4	1497.81	333.376	136.881	23948	39652.2	19177.4	Rhodopsin;
HIPPOLYTE_1-2-3_TRINITY_DN204322_c1_g3	0	0	1.01697	0	0.914808	0	0	0	1.25445	0	0	0	622.223	571.511	10404.5	6454.77	7870.52	1617.57	344.942	157.523	10802.3	16067.1	10962.4	Rhodopsin;
HIPPOLYTE_1-2-3_TRINITY_DN204566_c1_g1	0	3.16615	0	14.8798	0.892168	0.890722	0	0	0	3.40649	2.304	6.9793	4756.92	4256.89	144518	91180.9	169519	16405.1	3455.01	1215.38	221659	312456	149720	Rhodopsin;
HIPPOLYTE_1-2-3_TRINITY_DN204566_c2_g1	0	0	0	0	0	0	0	0	0	0	0	0.600068	178.287	103.381	5954.61	3547.09	4478.07	440.405	114.329	30.0046	5491.15	8653.5	5744.5	Rhodopsin, long-wavelength;
HIPPOLYTE_1-2-3_TRINITY_DN204662_c5_g1	0	0	0	0	0	0	0	0	0	0	0	0	43.4277	48.2094	552.8	601.043	662.277	100.064	34.3747	23.4876	639.311	939.719	848.04	Aristaless-related homeobox protein;
HIPPOLYTE_1-2-3_TRINITY_DN204839_c1_g1	0	0	0	0	0	0	0	0	0	0	0	0	67.2344	166.023	1065.88	1041.67	1158.5	262.397	110.928	61.9679	2814.13	3488.73	3345
HIPPOLYTE_1-2-3_TRINITY_DN204859_c2_g1	0	0	0	0	0	0	0	0	0	0	0	0	577.191	3212.07	9738.66	8060.17	12609.4	4460.5	825.744	1229.55	5647.91	5756.9	10315.7
HIPPOLYTE_1-2-3_TRINITY_DN204859_c2_g2	0	0	0	0	0	0	0	0	0	0	0	0	34.7105	207.051	476.776	388.27	508.619	236.241	55.5616	62.7187	402.528	421.5	497.336
HIPPOLYTE_1-2-3_TRINITY_DN204859_c2_g3	0	0	0	0	0	0	0	0	0	0	0	0	82.9248	548.964	2056.82	1393.99	1754.82	617.477	101.325	193.925	1185.3	1629.23	1781.36
HIPPOLYTE_1-2-3_TRINITY_DN204888_c4_g1	7.75181	4.38224	2.44818	1.31393	5.28456	0.979076	3.98086	4.16314	1.12964	2.19268	0	3.05063	122.625	62.9641	473.344	209.556	313.777	117.115	45.5761	34.7383	371.878	476.76	550.128
HIPPOLYTE_1-2-3_TRINITY_DN204947_c1_g1	0.631116	5.23209	1.85859	9.10433	4.78834	0.630142	1.59773	0	0	6.18586	11.0837	26.5104	8801.08	8112.49	254898	149788	200657	31645	6000.92	2390.22	255665	408468	311445	Rhodopsin;
HIPPOLYTE_1-2-3_TRINITY_DN204992_c0_g1	0	0.499287	0	3.61542	0	0	0.915088	0	0	3.52751	0	0	265.99	370.612	1002.02	755.96	1253.46	470.446	281.259	661.882	3614.74	6348.28	3790.79
HIPPOLYTE_1-2-3_TRINITY_DN204992_c0_g2	0	0	0	10.1404	0.871205	1.85325	0	0	0	0	0	0	80.498	109.517	506.543	365.247	678.346	89.0253	93.7371	162.261	1793.06	2779.86	2026.88
HIPPOLYTE_1-2-3_TRINITY_DN205315_c2_g1	0	0	0	0	0	0	0	0	0	0	0	0	115.288	96.4374	2938.91	1759.33	2345.76	307.259	65.9885	24.5492	2898.82	5212.49	3428.07	Rhodopsin, long-wavelength;
HIPPOLYTE_1-2-3_TRINITY_DN205467_c1_g1	0	2.44496	0	3.20699	0	0	0.667755	1.25361	1.33039	1.22908	0	1.95625	2575.59	2749.43	46219.7	23376.2	36889.4	7302.42	1564.03	817.07	37018.1	60780.7	44468.9	Rhodopsin;
HIPPOLYTE_1-2-3_TRINITY_DN205467_c1_g2	0.908814	1.0546	0	0	0	0	0	0	0	0	0	0	398.155	876.917	5165.14	2776.22	4001.36	932.983	319.205	121.828	4142.6	6548.55	4870.86	Rhodopsin;
HIPPOLYTE_1-2-3_TRINITY_DN205488_c7_g1	3.86244	2.18604	6.08644	1.31428	0.880304	10.727	1.993	2.08353	0	3.29301	1.17953	0.760957	167.411	70.6198	265.481	251.517	344.322	116.64	70.3027	45.3583	305.367	482.008	417.066
HIPPOLYTE_1-2-3_TRINITY_DN205508_c2_g2	0	0	0	0	0	0	0	0	0	0	0	0	61.2299	117.437	396.033	265.805	398.43	132.305	45.9699	18.1566	452.37	889.344	576.863	Xylose isomerase ;
HIPPOLYTE_1-2-3_TRINITY_DN205508_c2_g4	0	0	0	0	0	0	0	0	0	0	0	0	98.2193	173.177	397.567	399.199	330.128	202.111	87.8883	53.3774	429.143	912.019	614.971	Xylose isomerase ;
HIPPOLYTE_1-2-3_TRINITY_DN205508_c4_g1	0	0	0	0	0	0	0	0	0	0	0.581098	0	1507.39	1895.45	9248.44	7599.5	8846.23	2373.47	768.101	309.327	10587.7	22568.1	14425.5
HIPPOLYTE_1-2-3_TRINITY_DN205508_c4_g2	0	0	0	0	0	0	0	0	1.00135	0	0	0	1213.14	3121.65	5782.08	6024.59	5334.51	3914.07	1451.19	822.053	8795.09	13961.5	9561.42	Xylose isomerase;
HIPPOLYTE_1-2-3_TRINITY_DN205508_c4_g4	0	0	0	0	0	0	1.01543	0	0	0	0	0	1349.49	2435.98	7454.42	6827.92	7165.79	2644.37	1020.47	482.316	9987.75	18608.9	12378.4	Xylose isomerase ;
HIPPOLYTE_1-2-3_TRINITY_DN205508_c4_g5	0	0	0	0	0	0	0	0	0	0	0	2.96578	1820.24	1825.69	8352.97	6680.91	8474.35	2579.68	585.885	359.253	11337.9	23980.7	13947.4
HIPPOLYTE_1-2-3_TRINITY_DN205508_c4_g6	0.955214	2.17288	0	0	0.881705	0	4.02277	0	0	1.10747	0	0	1391.1	3453.13	9523.65	9964.65	8810.33	4141.42	1579.85	782.107	13348.5	23750.4	16188.9	Xylose isomerase;
HIPPOLYTE_1-2-3_TRINITY_DN205513_c0_g1	21.4113	12.1447	8.77632	9.4398	8.16171	4.27309	10.9618	7.67687	4.15892	10.5193	4.41716	11.3218	567.047	468.622	2920.31	2473.63	2821.83	653.468	315.888	119.338	3007.64	4402.81	4182.18	Probable diacyglycerol O-acyltransferase tgs1;
HIPPOLYTE_1-2-3_TRINITY_DN205930_c1_g1	0	0	0.491979	0	0	0	0	0	0	0	0	0.302506	390.688	848.074	19646.4	7080	11369	982.521	314.255	121.778	13086.4	26077.7	27433.9
HIPPOLYTE_1-2-3_TRINITY_DN205971_c0_g1	0	0	0	0	0	0	0	0	0	7.43332	0	0	943.17	1091.51	1140.12	424.433	462.983	815.516	499.591	347.919	853.061	1071.29	1359.66	Compound eye opsin BCRH1;
HIPPOLYTE_1-2-3_TRINITY_DN205995_c2_g1	0.708673	0	0	0	0	0	6.43238	0.766599	0	0	3.26735	1.06415	404.915	230.408	7711.32	8861.6	9344.86	770.941	867.137	289.765	2990.67	1441.32	4634.57
HIPPOLYTE_1-2-3_TRINITY_DN206185_c5_g2	0	0	0	1.37511	0	0	0	0	0	0	0	0	7.93716	15.0284	129.129	89.8844	222.535	20.2799	2.98855	7.06463	322.994	647.631	413.342
HIPPOLYTE_1-2-3_TRINITY_DN206187_c2_g1	0	12.4913	0	0	0	0	0	0	0	0	0	0	0	7.01562	631.235	362.195	292.81	0.410653	4.82876	0	1135.28	2008.11	2104.86	Rhodopsin;
HIPPOLYTE_1-2-3_TRINITY_DN206260_c0_g1	0	0	0	0	0	0	0	0	0	0	1.06207	5.27409	378.64	221.291	11904	5751.93	9555.6	979.892	196.642	64.2224	9564.53	15632.7	12187.4	Rhodopsin;
HIPPOLYTE_1-2-3_TRINITY_DN206485_c3_g2	0	0	0.536607	0.693905	0	2.58443	0	0	0	0	0	0	581.164	717.286	1809.96	2203.6	1725.98	658.384	463.308	477.349	1785.94	3765.05	3574.43
HIPPOLYTE_1-2-3_TRINITY_DN207407_c3_g1	0.688686	1.55704	1.74055	0	0.62571	0	0	4.68931	0	3.89331	0	0.542501	85.5191	60.8457	171.32	151.375	513.499	58.1759	71.8986	10.901	313.833	480.023	304.645
HIPPOLYTE_1-2-3_TRINITY_DN207407_c3_g2	8.18548	7.45822	6.95186	19.3521	6.60796	4.44152	6.52996	5.85398	9.53178	5.13831	1.33951	16.4454	57.5523	61.6406	443.612	377.24	478.104	106.89	63.7178	23.8314	296.941	381.642	481.697
HIPPOLYTE_1-2-3_TRINITY_DN207455_c8_g1	0	0	0.968486	0	0	0	0	0	0	0	0	0	114.638	418.787	1129.52	797.924	1558.79	804.338	298.499	476.211	947.748	1287.24	1480.5
HIPPOLYTE_1-2-3_TRINITY_DN207533_c2_g1	0	0	0	0	0	0	0	0	0	0	0	0	53.7523	50.7686	382.966	98.3058	370.87	42.5377	53.2661	125.879	1103.63	1735.1	1434.13
HIPPOLYTE_1-2-3_TRINITY_DN207594_c7_g1	0.877533	0	0	0	0	0	0	0	0	0	10.7035	0.690556	210.489	229.958	584.44	517.211	375.004	129.362	124.998	85.6155	478.895	648.31	705.761
HIPPOLYTE_1-2-3_TRINITY_DN207653_c0_g1	0	1.0397	0	5.47845	0.917745	1.61344	0	0	0	1.06987	0	4.86998	3972.57	9640.92	84736.9	48220.5	49976.3	8361.63	4407.43	953.288	148027	261744	238014
HIPPOLYTE_1-2-3_TRINITY_DN207664_c8_g2	8.79708	10.0036	20.8977	12.1553	8.92707	25.2665	15.7313	4.8303	8.36941	4.0763	1.08123	7.40854	64.807	84.2909	130.433	260.217	378.374	113.985	89.1242	76.7792	449.121	624.107	477.688
HIPPOLYTE_1-2-3_TRINITY_DN207708_c3_g1	0.424613	0	0	0.58498	0	0	0	0.464692	0	0	0	0	458.673	80.8511	673.696	232.728	407.161	205.439	80.316	50.9845	402.306	649.69	683.811
HIPPOLYTE_1-2-3_TRINITY_DN208190_c5_g1	0	0	0.775832	0	0	0	0	0	0	0	0	0	904.681	2913.87	4178.38	4823.72	3960.49	1822.64	1124.48	761.939	6655.85	7596.93	6509.7
HIPPOLYTE_1-2-3_TRINITY_DN208377_c1_g1	0	7.63358	0	5.6927	0	0	0	0	0	0	3.17128	7.87251	5638.4	3685.81	97670.5	52965.5	76080.2	11111	2704.84	1029.06	83875.8	143490	102563	Rhodopsin;
HIPPOLYTE_1-2-3_TRINITY_DN208800_c1_g1	0	2.28747	4.92141	1.37942	0	1.90764	5.23573	1.09426	1.18662	1.01044	0	2.07018	29.313	47.4314	156.63	148.616	232.815	100.785	32.5102	16.2004	380.207	432.365	418.801
HIPPOLYTE_1-2-3_TRINITY_DN208898_c0_g3	1.92165	3.62112	10.5827	0	3.41608	0	5.71926	0	0	0.724712	0	0	200.215	236.219	1728.08	720.425	1772.76	330.142	158.409	60.9086	2257.96	3881.07	2681.21
HIPPOLYTE_1-2-3_TRINITY_DN209574_c0_g1	1.91347	0	1.20662	0	0	0	0.986368	3.09374	0	3.25958	0	0	72.3485	113.281	537.136	655.723	511.255	327.114	86.7535	89.2937	920.905	1019.83	901.221
HIPPOLYTE_1-2-3_TRINITY_DN209804_c1_g2	3.83077	0.551321	1.24856	0	3.53782	3.84357	15.8277	0	0	13.2046	7.10541	1.52398	128.482	201.324	606.793	700.494	647.248	273.673	91.8603	51.3747	1849.98	3150.48	3681.83	Filamin-A;
HIPPOLYTE_1-2-3_TRINITY_DN209929_c7_g1	22.1011	14.4141	6.06258	13.116	2.84383	0	12.7748	9.68647	9.80184	9.11652	15.3904	5.80164	1169.9	852.357	3734.02	1668.24	1832	682.408	621.601	872.477	1627.18	2711.31	2292.16	Pigment-dispersing hormone type 1;
HIPPOLYTE_1-2-3_TRINITY_DN209936_c2_g1	1.62587	0	0	0	0	0	0	0	0	0	0	1.2343	614.232	197.397	7230.36	7146.28	8689.75	371.301	187.552	130.368	7312.65	10638.8	16932.4
HIPPOLYTE_1-2-3_TRINITY_DN210069_c3_g1	0	0.68262	0	5.49769	0	0.608581	0	0	0	0.68509	1.47319	2.36291	533.785	406.295	1457.72	2036.32	1860.2	585.209	284.079	188.971	2283.02	4324.32	3363.45	Peptidyl-prolyl cis-trans isomerase B;
HIPPOLYTE_1-2-3_TRINITY_DN210463_c0_g2	14.5079	8.7552	0	2.62965	13.2134	3.90447	16.9419	0	0	24.1513	18.894	12.893	1451.02	1616.1	2562.4	1653.28	2135.33	1470.87	1118.76	728.28	1621.45	2044.87	1469.91	Compound eye opsin BCRH1;
HIPPOLYTE_1-2-3_TRINITY_DN210858_c1_g1	0	0	0	0	0	0	0	0	0	0	0	0	75.251	16.0973	672.825	541.671	864.553	61.7205	41.1255	11.1366	1342.77	1262.77	1646.56
HIPPOLYTE_1-2-3_TRINITY_DN210858_c1_g3	0.342364	0	0	0	0	1.00353	0	3.80364	0	0	3.82786	0	100.51	46.558	1155.55	919.524	1263.58	125.41	59.2783	31.5266	1974.29	2605.02	2152.42
HIPPOLYTE_1-2-3_TRINITY_DN210962_c1_g1	0	0	1.18769	0	0	0	0	0	0	0	0	0	22.5714	40.4741	102.659	152.7	169.725	56.4593	45.9835	18.8651	350.227	469.105	670.689
HIPPOLYTE_1-2-3_TRINITY_DN210992_c2_g1	13.9476	7.01713	6.83729	2.10959	7.06484	2.34455	3.99893	7.52495	8.16389	1.76197	1.89315	0.606382	190.249	115.343	286.967	204.117	316.372	167.638	75.7291	46.1148	323.914	398.087	481.996
HIPPOLYTE_1-2-3_TRINITY_DN211197_c1_g1	0	3.28698	7.66789	1.89286	1.26704	2.4785	5.69821	2.67208	0	8.53419	2.00949	0.540233	82.8159	96.2604	175.43	274.111	286.059	114.689	40.4229	40.9598	318.993	680.694	583.327
HIPPOLYTE_1-2-3_TRINITY_DN211298_c1_g1	0	2.04989	0	4.07561	0	0	0	0	0	6.50977	4.40277	4.11376	3127.17	2740.18	74562.2	44610.7	62159.8	11948.8	2798.4	966.75	77665.2	109604	65798.7	Rhodopsin;
HIPPOLYTE_1-2-3_TRINITY_DN211840_c6_g2	2.89621	1.09323	4.86455	2.63145	0	0	0.997954	2.08631	0	3.29773	3.53972	11.3126	58.0172	149.057	320.963	451.285	427.973	121.826	68.5842	19.453	732.987	929.976	477.819	Arrestin homolog;
HIPPOLYTE_1-2-3_TRINITY_DN212002_c4_g1	0	0	0	0	0	0	0	0	0	0	0	0	41.9043	67.0722	312.999	516.809	554.644	254.045	33.9823	50.6879	1485.91	2422.88	1821.98
HIPPOLYTE_1-2-3_TRINITY_DN212268_c5_g1	3.87966	5.48085	2.45238	1.31345	2.64206	3.92255	1.98899	5.2008	0	3.28673	4.72932	1.52983	162.647	239.816	390.518	473.533	371.906	396.42	250.47	144.483	622.317	646.224	724.196	Carcinine transporter ;
HIPPOLYTE_1-2-3_TRINITY_DN212345_c0_g1	0	0	0	0	0	0	1.78661	0	0	1.88763	0	0	1097.2	2152.72	19859.4	11855.1	11998.2	2161.69	1141.18	284.286	28658.7	47555.2	45728.3	Rhodopsin;
HIPPOLYTE_1-2-3_TRINITY_DN212345_c2_g2	0	1.03858	0	0	0	0	0	0	0	0	0	0	671.944	1452.45	4517	3019.1	4197.52	1167.83	537.15	370.36	5673.36	5626.35	3740.68	Rhodopsin;
HIPPOLYTE_1-2-3_TRINITY_DN212388_c5_g1	26.0451	19.2122	21.4377	7.69382	8.73093	21.8603	29.5664	18.6043	18.9399	5.3524	14.6327	21.0313	295.46	229.437	978.696	1153.96	1137.53	436.488	351.823	104.562	825.665	985.271	1128.43
HIPPOLYTE_1-2-3_TRINITY_DN212426_c6_g1	29.3727	13.2014	18.8667	9.68555	7.07651	5.33088	12.1023	11.4996	1.04161	9.26417	1.08228	11.8375	228.491	118.514	331.252	208.707	344.848	231.06	82.105	32.8839	511.328	531.686	391.275
HIPPOLYTE_1-2-3_TRINITY_DN212430_c0_g1	11.0456	1.95535	3.64693	2.34219	23.7985	7.80759	3.81694	0.858475	8.05373	18.3896	24.6963	5.46238	256.673	323.705	8757.92	3178.53	6821.39	553.487	245.054	221.566	12763.4	14959.6	11308.7
HIPPOLYTE_1-2-3_TRINITY_DN212679_c5_g1	23.4475	25.0425	29.7805	10.6523	6.24816	14.3123	10.085	29.2257	14.5607	10.9668	2.34108	5.29788	133.637	122.025	317.891	243.95	202.623	186.228	108.579	60.3789	378.672	407.989	480.187
HIPPOLYTE_1-2-3_TRINITY_DN212931_c3_g1	2.7435	0	0	1.63122	0	0.537055	0	0	0	0	0	3.59016	1555.71	2238	12407.6	7558.62	11610.6	3066.11	982.258	398.942	14806.2	25144.1	32100.7
HIPPOLYTE_1-2-3_TRINITY_DN213072_c3_g1	10.9404	8.48336	3.60628	5.82718	5.21715	0.273208	0.29881	1.99395	0	2.19804	0.971254	0.211179	181.838	164.401	250.428	664.015	563.835	331.264	237.419	164.396	611.454	818.048	579.247
HIPPOLYTE_1-2-3_TRINITY_DN213124_c4_g1	12.7179	14.9528	11.4335	6.96451	10.7151	18.0951	10.9583	10.1328	15.5855	9.95952	16.3832	6.17307	161.522	97.5977	562.767	313.244	369.635	156.806	91.4845	65.6986	245.48	335.831	321.745
HIPPOLYTE_1-2-3_TRINITY_DN213701_c3_g1	1.9157	5.44102	1.19954	6.59726	0.881542	5.76458	3.01113	1.04811	2.27098	2.21067	4.70324	6.63	554.125	501.204	4485.82	4497.62	5751.6	1203.21	203.442	138.747	7114.39	13671.7	8021.58
HIPPOLYTE_1-2-3_TRINITY_DN213701_c3_g2	0.934769	2.20398	3.66428	0	0.889934	0	0.970962	1.01458	1.14438	0	3.56968	0	145.125	479.223	693.661	807.964	820.661	469.339	148.866	106.703	1560.42	2631.45	1504.1
HIPPOLYTE_1-2-3_TRINITY_DN213701_c3_g3	0	0	0	0	0	0	0	0	0	0	0	0	14.1314	43.627	263.107	371.521	359.014	64.7437	20.5064	13.4673	656.801	818.084	697.148	Xylose isomerase;
HIPPOLYTE_1-2-3_TRINITY_DN213701_c3_g4	0	0	0	0	0	0	0	0	0	0	0	0.63487	24.1366	62.74	310.79	321.947	301.019	96.3382	25.8481	13.1866	568.703	884.357	760.975	Xylose isomerase;
HIPPOLYTE_1-2-3_TRINITY_DN213701_c3_g5	0	0	0	0	0	0	0	0	0	1.10564	0	0	40.6336	116.338	367.869	344.897	506.107	156.592	34.86	39.3972	786.779	1139.46	962.222
HIPPOLYTE_1-2-3_TRINITY_DN213701_c3_g7	0	0	0	0	0	0	0	0	0	0	0	0	20.5161	40.0629	221.543	276.094	343.53	64.7938	14.099	3.76759	518.439	805.834	685.741
HIPPOLYTE_1-2-3_TRINITY_DN213701_c4_g1	0	0	0	0	0	0	0	0	0	0	0	0	26.5068	58.7656	234.936	286.803	221.732	83.7409	32.5735	21.2439	445.812	653.434	516.309	Xylose isomerase;
HIPPOLYTE_1-2-3_TRINITY_DN214006_c3_g1	0	0	0	1.73451	0.444778	0	0	0	0	0	1.14523	1.80981	2044.85	1335.33	56009.1	29209.3	44245.5	5684.85	1109.15	512.306	52365.9	95802.1	69685.3	Rhodopsin;
HIPPOLYTE_1-2-3_TRINITY_DN214006_c4_g1	0	0	0	1.37698	0	0	0	0	0	0	0	2.37451	346.902	200.944	9135.58	4845.24	7367.63	841.533	198.216	106.822	8049.72	14807.9	11523.9	Rhodopsin;
HIPPOLYTE_1-2-3_TRINITY_DN214006_c5_g1	0	0	0	0	0	0	0	0	0	0	0	0	28.1202	17.316	932.806	446.927	703.752	60.4161	16.5438	4.74837	936.305	1573.46	1224.12	Rhodopsin;
HIPPOLYTE_1-2-3_TRINITY_DN214057_c0_g1	0	0	0	0	0	0	0	0	0	0	0	0	728.527	1154.38	15502.3	7074.04	6387.79	954.415	367.07	109.103	14911.8	36057	36974.6	Opsin-1;
HIPPOLYTE_1-2-3_TRINITY_DN214071_c2_g1	0	0	0	0	0	0	0	0	0	0	0	0	3.25221	304.141	421.755	860.174	987.077	733.004	10.4509	294.79	681.507	619.337	1774.98
HIPPOLYTE_1-2-3_TRINITY_DN214106_c1_g2	0.952965	0	0	0	0	0.960148	0	0	0	0	0	0	7.72281	9.4658	326.321	417	429.268	28.2852	29.261	12.8199	237.033	194.918	136.046	U-scoloptoxin(01)-Er1a ;
HIPPOLYTE_1-2-3_TRINITY_DN214137_c0_g2	29.1592	24.682	24.1327	15.009	23.8182	14.3067	21.0384	29.0817	2.91257	10.0968	8.64915	7.72143	421.239	486.915	729.485	720.254	1000.7	678.318	474.24	258.8	1487.67	1708.85	2180.87
HIPPOLYTE_1-2-3_TRINITY_DN214158_c0_g3	0.771156	0	0	0	2.40285	0	0	0	1.53221	0	0	0	21.573	348.661	2104.42	616.063	966.629	222.554	74.6949	310.671	218.373	1081.33	1448.35	Cuticle protein AMP2;
HIPPOLYTE_1-2-3_TRINITY_DN214308_c2_g1	10.224	6.99452	5.37705	24.5815	7.34921	7.135	10.6971	5.35005	19.1375	3.73056	24.6814	6.00542	27.3198	33.2082	258.521	214.806	193.991	70.5799	20.3369	22.6193	401.412	418.612	492.149
HIPPOLYTE_1-2-3_TRINITY_DN214372_c3_g1	0	8.47366	1.46298	0	0	0	0	0	0	1.31043	0	0.911455	331.039	1161.42	1752.03	3621.45	2615.17	4403.08	1321.89	1299.72	8766.07	9603.27	7000.34	Hemocyte protein-glutamine gamma-glutamyltransferase;
HIPPOLYTE_1-2-3_TRINITY_DN214475_c1_g1	10.4786	10.8469	5.94125	5.28837	6.1731	10.4747	14.1073	7.36043	2.27597	23.3008	4.69184	10.8682	21.0729	32.7305	306.905	118.841	287.312	38.3346	26.5393	10.6606	525.717	629.346	466.826
HIPPOLYTE_1-2-3_TRINITY_DN214658_c10_g1	11.1384	11.6714	8.86536	11.0595	12.5902	10.3256	10.7373	6.54216	6.07729	20.6939	13.6578	13.3304	37.2478	53.417	527.782	421.581	512.099	56.1206	32.959	24.2909	873.437	1110.49	858.409
HIPPOLYTE_1-2-3_TRINITY_DN214745_c0_g3	9.04258	12.6416	9.23936	5.34949	4.19172	6.62774	8.13312	4.95996	4.60995	4.47945	14.6754	16.9776	1380.1	2275.14	4747.36	5392.03	1634.4	2405.7	1339.39	230.215	1077.18	4476.8	5826.73	Compound eye opsin BCRH2;
HIPPOLYTE_1-2-3_TRINITY_DN214887_c2_g4	0	0	3.38658	0	0	0	0	0	0	0	0	0	375.955	220.029	1496.13	1175.88	1105.45	232.282	155.923	150.283	1576.69	1943.45	1863.12
HIPPOLYTE_1-2-3_TRINITY_DN215073_c0_g1	0	0	0	0	0	0	0	0	0	0	0	0	46.7529	31.1649	351.193	336.45	331.751	29.0694	17.4311	26.7372	498.199	705.338	743.007
HIPPOLYTE_1-2-3_TRINITY_DN215073_c0_g2	0	0.730259	0	1.76403	1.17996	0.609592	1.33984	1.39989	0	4.42702	0	0	677.612	463.653	5997.93	5010.85	5687.86	479.536	374.966	624.479	8387.79	10136.8	10103.4
HIPPOLYTE_1-2-3_TRINITY_DN215929_c0_g1	3.82756	0	0	6.54086	3.49542	7.67596	0	0	0	0	0	0.728901	278.128	372.351	1432.41	1135.76	1554.24	275.633	361.728	658.736	4502.59	5898.61	4388.04
HIPPOLYTE_1-2-3_TRINITY_DN215929_c0_g2	0.398958	0	0	7.33698	6.06793	0.402066	0	0	0	0	0	0.622878	308.857	489.943	1899.71	1595.58	1696.14	486.142	557.774	1052.95	4875.54	5741.91	4781.05	Cuticle protein 7;
HIPPOLYTE_1-2-3_TRINITY_DN216321_c4_g1	1.35466	0	0	0	0	0	0	0	0	0	0	0	542.446	378.425	1453.5	1045.19	1659.59	390.905	279.145	155.526	1779.77	2990.67	2301.21
HIPPOLYTE_1-2-3_TRINITY_DN216666_c3_g1	0	0	0	4.01332	4.42865	0	1.02886	0	1.15084	1.12792	1.16072	8.02404	7864.28	11275.1	167186	82299.1	102729	10688.3	5090.71	1252.61	237750	461738	438387	Rhodopsin;
HIPPOLYTE_1-2-3_TRINITY_DN217060_c6_g1	20.5704	18.1386	10.6196	10.1622	13.4193	15.1029	7.70114	14.0916	8.73801	6.3625	1.75599	11.8879	126.55	125.42	144.576	222.771	255.116	167.417	81.6576	53.148	302.478	416.837	482.184
HIPPOLYTE_1-2-3_TRINITY_DN217580_c5_g5	3.83246	6.53012	1.2001	1.31935	7.93361	8.65066	5.01753	17.8148	3.40613	6.63091	8.23149	9.58416	93.1384	129.011	580.112	499.115	693.918	143.705	88.2387	52.2229	782.953	1247.14	1426.23
HIPPOLYTE_1-2-3_TRINITY_DN217749_c0_g2	0	0	0	0	0	0	0	0	0	2.20205	2.35742	8.98838	53.3065	67.8548	2002.35	620.512	1582.36	58.1563	135.934	56.0409	827.46	2134.61	413.495
HIPPOLYTE_1-2-3_TRINITY_DN218301_c10_g2	0	0	0.82704	0	0	0	0.72618	0	0	0	0	0	299.336	365.204	2023.75	1686.46	2197.17	374.762	192.02	93.2323	4458.72	6319.76	7045.57
HIPPOLYTE_1-2-3_TRINITY_DN218301_c10_g3	0	0	0	0	0	0	5.0306	0	1.13702	3.32377	0	1.45856	780.722	917.41	4471.67	3954.7	4240.16	1293.17	601.811	293.85	8827.07	12026.9	11589.9
HIPPOLYTE_1-2-3_TRINITY_DN218354_c3_g1	0	0	0	0	0	0	0	0	0	0	0	0	28.6891	13.9865	403.675	200.539	224.532	46.6634	12.5261	25.236	425.894	764.753	489.149
HIPPOLYTE_1-2-3_TRINITY_DN218433_c1_g4	24.1237	15.6884	20.2865	28.7024	13.5094	13.0202	5.4102	22.316	10.6992	14.7414	5.70862	11.5637	154.152	90.2881	550.318	364.152	311.055	170.045	108.509	84.0129	246.943	240.917	312.945
HIPPOLYTE_1-2-3_TRINITY_DN218599_c3_g2	0.709362	2.55694	7.30844	5.59105	10.5247	5.12007	1.94951	0	4.2904	1.67046	3.56732	0	28.9428	205.965	419.23	303.717	420.309	172.079	41.7048	89.5562	380.821	310.015	364.362
HIPPOLYTE_1-2-3_TRINITY_DN219030_c3_g5	0	0	0	0	0	0	0	0	0	0	0	0	162.98	215.746	1000.58	312.329	559.063	344.069	65.5103	31.6905	281.815	331.344	216.799	Rhodopsin;
HIPPOLYTE_1-2-3_TRINITY_DN219030_c4_g2	0.689015	0	0	0	2.79707	0	0.986021	0	0	0.875507	4.08142	6.22367	2160.25	1511.73	43964.1	24287.3	36264	3932.62	841.507	262.845	40608	70400.8	53119.8	Rhodopsin;
HIPPOLYTE_1-2-3_TRINITY_DN219503_c0_g2	3.83816	0	0.97519	0	0	0	0.792024	0	0	0	0	0	116.712	184.027	2627.41	820.901	1818.9	215.521	104.894	38.4858	3166.69	3690.84	2624.92	Probable diacyglycerol O-acyltransferase tgs1;
HIPPOLYTE_1-2-3_TRINITY_DN219521_c4_g2	0.424429	0	0	0	1.97791	0.422082	7.1461	14.2203	0	0	0	0	252.834	173.24	2734.55	2375.44	3325.39	471.06	186.976	66.9516	4606.96	8077.15	6317.95
HIPPOLYTE_1-2-3_TRINITY_DN219658_c2_g2	0.833008	0	0	6.49473	1.66393	0	0.991835	0	0	0	1.06159	0.956599	3673.52	10138.4	32295.5	16645.2	21190.7	9397.74	2992.63	1065.22	20511.6	31156	27507.4	Rhodopsin;
HIPPOLYTE_1-2-3_TRINITY_DN220046_c3_g1	0	0	0	0	0	0	0	0	0	0	0	0	260.911	524.194	1853.45	1578.48	1799.42	412.418	443.991	672.347	2652.36	3179.75	2589.69
HIPPOLYTE_1-2-3_TRINITY_DN220046_c4_g1	0	0	0	0	0	0	0	0	0	0	0	0	353.897	676.724	3520.92	2968.18	3733.8	597.443	588.358	1046.26	6624.4	7306.45	5020.24
HIPPOLYTE_1-2-3_TRINITY_DN220046_c4_g2	0	0	0	0	0	0	0	0	0	0	0	0	283.269	473.244	2679.37	2039.03	2537.76	434.66	465.361	691.338	3910.32	4972.23	4036.01
HIPPOLYTE_1-2-3_TRINITY_DN220046_c4_g3	0	0	0	0	0	0	0	0	0	0	0	0	1538.95	1664.58	17613.4	11583.7	14105.8	2037.72	1439.66	2812.48	20141.1	30312.4	25058.4
HIPPOLYTE_1-2-3_TRINITY_DN220046_c4_g4	0	0	0	0	0	0	0	0	0	0	0	0	50.1886	99.3446	273.913	212.612	192.656	85.1478	83.9408	127.907	383.924	406.833	351.901
HIPPOLYTE_1-2-3_TRINITY_DN220046_c4_g5	0	0	0	0	0	0	0	0	0	0	0	0	82.5253	264.261	1148.4	865.03	963.219	205.78	253.469	316.087	1517.5	1668.01	1222.62	Cuticle protein 21;
HIPPOLYTE_1-2-3_TRINITY_DN220636_c1_g1	0	0	0	0	0	0	0	0	0	0.649563	0	0.443645	381.559	138.4	3750.96	3505.14	3722.24	185.482	104.973	114.075	4189.98	6153.68	6867.13
HIPPOLYTE_1-2-3_TRINITY_DN220636_c1_g2	0	0	0	0	0	0	0	0	0	0	0	0	175.585	133.93	1436.43	1734.92	1482.5	204.339	86.1198	89.4416	2093.45	2422.53	2849.37
HIPPOLYTE_1-2-3_TRINITY_DN220768_c3_g1	22.6227	10.6944	16.5665	9.04856	3.45788	7.57945	19.6428	10.2602	2.22444	2.16336	5.77488	0	374.398	348.544	1351.92	1907.39	2251.12	445.187	246.787	122.93	2034.62	2874.2	3538.65
HIPPOLYTE_1-2-3_TRINITY_DN221072_c1_g1	0	0	0	0	0	0	0	0	0	0	3.53335	0	128.794	125.198	402.746	218.098	752.173	175.143	93.1129	107.173	948.479	490.798	864.16	Cuticle protein AMP2;
HIPPOLYTE_1-2-3_TRINITY_DN221216_c2_g2	8.78794	3.62892	3.94863	1.5493	0	0	4.3416	0	0	0	0	0	131.272	50.7552	568.389	476.775	708.284	106.612	45.2691	13.4444	463.599	1035.74	1105.38
HIPPOLYTE_1-2-3_TRINITY_DN221220_c2_g1	5.86912	0	0	5.57872	0	1.01165	7.01419	4.30182	0	1.05883	0	4.01312	182.657	86.4674	362.272	377.175	445.779	115.003	65.2077	105.123	310.391	426.039	351.488
HIPPOLYTE_1-2-3_TRINITY_DN221465_c0_g6	7.74651	6.57078	6.11305	6.57132	0.880811	7.8238	6.97006	3.12367	3.39001	8.77503	2.36295	0.761074	160.062	85.6499	369.589	359.089	366.296	158.756	71.2763	37.1847	241.055	411.751	408.888
HIPPOLYTE_1-2-3_TRINITY_DN221954_c0_g2	0	0	0	0	0.880636	0	0	0	0	0	0	4.59834	70.6304	141.868	189.441	211.029	162.809	244.151	158.047	73.4105	372.027	404.352	341.474
HIPPOLYTE_1-2-3_TRINITY_DN221963_c1_g5	5.72625	4.86239	3.60799	23.429	0	1.44347	12.2727	3.09144	0.838431	1.62875	13.4052	1.67905	133.11	147.698	92.5239	218.78	187.632	242.673	219.134	151.977	419.609	344.904	485.345
HIPPOLYTE_1-2-3_TRINITY_DN222299_c2_g1	0	0	0	0	0	0	0	0	0	0	0	0	27.1623	57.4021	561.762	519.862	585.952	102.682	46.8362	38.5361	1253.19	1555.82	1179.46
HIPPOLYTE_1-2-3_TRINITY_DN222299_c3_g1	0	0	0	0.99014	0	0	0	0	0	0	0	0	81.001	157.6	1617.27	1131.53	1850.43	207.614	79.1454	47.9129	3469.65	5801.91	5120.77
HIPPOLYTE_1-2-3_TRINITY_DN222299_c3_g3	0	0	0	0	0	0	0	0	0	0	0	0	15.154	15.1621	125.725	110.205	153.138	11.4175	13.475	6.14129	301.061	432.176	333.264
HIPPOLYTE_1-2-3_TRINITY_DN222328_c2_g1	2.02769	0	2.53982	0.930729	3.10929	1.35612	1.41583	0	8.81039	0	0	1.04017	2870.44	11952.8	6917.96	10914.9	15180.1	6082.98	2601.21	3566.04	10091.1	10075.2	11620.6	U-scoloptoxin(01)-Cw1a ;
HIPPOLYTE_1-2-3_TRINITY_DN222423_c4_g4	3.70318	7.77769	19.0151	1.83512	1.53606	2.0362	7.30737	12.3506	5.52397	0.997252	0	2.32717	424.777	792.956	2966.29	1711.42	2546.46	775.343	514.308	209.288	1902.53	2874.12	2577.98
HIPPOLYTE_1-2-3_TRINITY_DN222423_c4_g6	0	0	1.18978	1.32173	0.881821	0	6.04266	2.10202	1.13766	1.10902	0	0.726194	177.755	244.789	2001.7	983.839	1833.07	435.934	205.509	90.1453	1689.12	2150.55	1924.9
HIPPOLYTE_1-2-3_TRINITY_DN224308_c3_g1	0	0	0	0	0	0	0	0	0	0	0	0	23.9873	24.6374	256.416	154.871	248.708	62.1213	12.8017	5.11044	402.634	596.605	555.945
HIPPOLYTE_1-2-3_TRINITY_DN224856_c0_g1	0	0.435621	0	0.922824	0	0	0	0	0	0	0	8.69767	85.1583	180.629	1268.69	1260.67	1332.05	433.385	136.943	94.5479	4054.51	4694.52	3713.45
HIPPOLYTE_1-2-3_TRINITY_DN224856_c0_g2	0	0	0	0	0.558266	0.619687	0	0	0	2.08583	2.24631	0	145.398	869.273	872.244	1313.27	629.966	1191.5	712.72	448.839	3607.67	2656.29	1903.09	Guanine nucleotide-binding protein subunit beta-2;
HIPPOLYTE_1-2-3_TRINITY_DN225187_c2_g1	0.815374	0.922399	0	1.12859	0	0	0	0	2.85714	1.88427	1.99042	1.9202	313.167	698.491	3272.85	2623.72	2859.88	627.869	434.422	181.768	5016.07	6304.33	5551.29	Arrestin homolog;
HIPPOLYTE_1-2-3_TRINITY_DN225187_c2_g2	0	0	0	0	0	0	0	0	0	0	0	0	7.68953	18.21	196.706	98.309	296.161	44.6342	31.1724	11.676	356.289	553.788	435.011
HIPPOLYTE_1-2-3_TRINITY_DN225419_c3_g2	8.80669	11.0627	4.92052	3.97965	17.7263	3.95533	6.02825	11.5581	1.14047	4.38292	0	2.31135	145.609	611.331	2420.39	1066.89	2022.12	711.652	446.801	109.28	3477.45	4360.54	3536.69	Innexin unc-9;
HIPPOLYTE_1-2-3_TRINITY_DN225517_c4_g1	15.406	13.5102	16.2741	3.40398	4.56315	6.87463	10.4432	2.83065	13.8023	5.96475	8.16269	6.0893	122.354	123.129	295.111	236.9	413.224	179.929	92.073	51.1852	477.608	710.06	584.413
HIPPOLYTE_1-2-3_TRINITY_DN225547_c0_g1	0	4.38156	0	0	0	0	0.995416	1.04096	0	0	1.18169	0.762029	6529.43	4591.79	9032.4	4859.72	9588.93	5276.98	2564.34	2513.89	13585.9	12283.7	16028.8	Opsin, ultraviolet-sensitive;
HIPPOLYTE_1-2-3_TRINITY_DN225607_c7_g2	0	0	0	0	0	0	0	0	0	0	0	0	71.3792	230.504	564.562	604.27	433.16	166.313	120.409	93.1297	795.22	987.717	680.12
HIPPOLYTE_1-2-3_TRINITY_DN225607_c7_g3	0	0	0	0	0	0	0	0	0	0	0	0	60.1415	210.553	391.248	433.484	377.841	139.225	69.0572	85.0192	508.911	718.925	533.06
HIPPOLYTE_1-2-3_TRINITY_DN225607_c8_g1	0	0	0	0	0	0	0	0	0	0	0	0	26.822	92.6942	283.364	218.096	214.38	70.836	51.4286	27.0199	396.427	513.008	392.406
HIPPOLYTE_1-2-3_TRINITY_DN225607_c8_g2	0	2.18327	0	0	0	0	0	0	0	0	0	0	919.699	1666.47	5972.48	4176.22	5818.25	1559.3	920.994	594.638	6240.31	10590.8	8024.39
HIPPOLYTE_1-2-3_TRINITY_DN225607_c8_g3	0	0	0	0	0	0	0	0	0	0	0	1.41815	548.187	1777.19	4788.04	3626.2	3999.27	1267.52	1027.45	885.326	5558.4	9219.43	5344.93
HIPPOLYTE_1-2-3_TRINITY_DN225607_c8_g4	0	0	0	0	0	0	0	0	0	0	0	0	185.496	527.712	492.22	484.794	466.408	204.928	217.946	166.3	827.461	1225.8	850.555
HIPPOLYTE_1-2-3_TRINITY_DN225607_c8_g5	0	0	0	0	0.899435	0	0	0	0	0	0	0	447.446	1387.81	3589.65	2882.54	3530.01	967.542	574.502	492.474	4360.47	6157.26	4491.42	U-scoloptoxin(01)-Cw1a ;
HIPPOLYTE_1-2-3_TRINITY_DN226121_c8_g1	0	0	0	0	0	0	0	0	0	1.4854	0.793025	0	58.0012	86.4572	759.38	474.237	710.541	89.5629	56.2538	23.5127	1278.09	1817.91	1390.16
HIPPOLYTE_1-2-3_TRINITY_DN226121_c8_g2	0	0	0	0	0	0	0	0	0	1.68091	0	6.28571	64.0286	89.227	1023.43	578.412	1107.89	112.32	72.7709	37.9602	1604.62	2509.16	1870.36
HIPPOLYTE_1-2-3_TRINITY_DN226564_c2_g1	0	0	0	0	0	0	0	2.90738	0	3.07116	0	0.53527	77.7368	179.524	201.15	327.561	369.915	242.349	152.142	74.3566	351.024	440.334	552.63	Glycine receptor subunit alpha-3;
HIPPOLYTE_1-2-3_TRINITY_DN226819_c1_g1	0	0	0	0	0	0	0	0	0	0	0	0	38.5054	57.9459	468.621	313.865	438.159	100.722	46.7361	25.4192	1239.41	3512.2	3017.84	Opsin-1;
HIPPOLYTE_1-2-3_TRINITY_DN226819_c1_g3	0	0	0	0	0	0	0	0	0	0	0	0	5.63111	9.32801	103.431	117.794	151.647	18.7922	14.3335	8.92743	661.849	1777.58	1811.13	Rhodopsin;
HIPPOLYTE_1-2-3_TRINITY_DN226819_c1_g5	0	0	0	0	0	0	0	0	0	0	0	0.486074	89.8189	218.766	887.706	447.686	498.019	395.182	128.159	44.135	792.469	1964.51	886.669	Opsin-1;
HIPPOLYTE_1-2-3_TRINITY_DN226819_c2_g1	0	0	0	0	0	0	0	0	0	0	0	0	135.099	273.295	2387.31	2014.76	2606.26	493.863	195.435	154.601	9992.83	29038.5	28059.5	Rhodopsin;
HIPPOLYTE_1-2-3_TRINITY_DN226823_c0_g2	2.91203	1.09667	0	0	0.880624	4.90957	6.95735	2.0793	0	0	1.18274	0	21.4998	62.185	141.808	315.15	173.025	174.806	74.6434	39.5232	491.939	791.936	883.138	Hi-UCFe
HIPPOLYTE_1-2-3_TRINITY_DN226932_c2_g1	0	5.99132	1.11566	0	1.60558	0	0	1.89732	3.08895	0.999302	0	0.695076	869.982	660.58	2721.07	2639.43	2292.67	879.478	461.037	348.717	2272	2076.49	2457.35	Carboxypeptidase N subunit 2;
HIPPOLYTE_1-2-3_TRINITY_DN227315_c6_g2	5.81393	8.76455	6.12059	2.62785	0.880759	4.89548	13.9329	4.16311	5.64818	5.48165	5.90918	2.28806	151.751	211.632	786.143	907.464	771.105	465	157.951	83.2095	1325.38	1151.83	1581.79
HIPPOLYTE_1-2-3_TRINITY_DN227328_c2_g1	0	0	1.25073	0	0	0	0	0	0	0	0	0	44.351	50.1788	425.717	392.551	367.578	120.635	61.2681	12.8116	683.069	741.013	597.113
HIPPOLYTE_1-2-3_TRINITY_DN227328_c2_g2	1.89985	3.2484	0	0	3.5282	0.947885	2.01948	4.21302	0	2.22352	0	2.8729	75.0268	173.536	714.252	833.277	639.794	355.162	162.81	83.849	1417.33	1304.37	1224.98
HIPPOLYTE_1-2-3_TRINITY_DN227328_c2_g3	4.83537	7.66024	7.31909	2.62977	7.04725	5.8555	2.99002	9.37844	0	0	7.08485	3.79061	417.579	992.599	2971.44	4037.73	2629.65	1884.97	1004.33	431.352	6814.95	5701.52	5466.7	Arrestin homolog;
HIPPOLYTE_1-2-3_TRINITY_DN227328_c2_g4	3.85791	5.46309	4.85636	0	5.28657	0.971624	4.99331	1.04377	2.26416	1.09999	1.1794	0	227.255	443.311	2237.22	2185.32	2039.74	757.382	327.223	147.644	4239.48	4689.66	4330.13
HIPPOLYTE_1-2-3_TRINITY_DN227328_c2_g5	0.883125	1.04121	0	0	0	0	0	0	0	0	0	0	79.4729	82.6662	797.271	722.678	862.573	223.051	90.5531	46.5723	1552.66	1922.44	1616.44
HIPPOLYTE_1-2-3_TRINITY_DN227433_c6_g1	19.9473	10.0323	3.72736	28.1289	5.38414	8.9461	9.89955	7.16548	14.9674	7.5495	5.41266	8.68609	7608.48	1471.42	13250.1	6191.28	4985.45	3383.01	1820.29	1123.44	6864.6	5999.96	6813.87	Acidic amino acid decarboxylase GADL1 ;
HIPPOLYTE_1-2-3_TRINITY_DN227433_c6_g3	9.42121	1.07743	0	0	0	0	0	0	0	0	0	0.700129	343.454	98.0289	819.974	400.138	273.431	215.682	98.0609	81.1177	363.389	334.231	393.364	Cysteine sulfinic acid decarboxylase;
HIPPOLYTE_1-2-3_TRINITY_DN227502_c0_g1	2.73952	8.08426	3.87432	0	0	3.69277	3.14449	0	0	0	1.24572	6.44261	145.228	168.12	275.879	419.12	238.418	273.981	192.223	104.171	322.219	318.62	381.742	Fez family zinc finger protein erm ;
HIPPOLYTE_1-2-3_TRINITY_DN227665_c2_g1	28.0997	24.102	24.4808	3.94182	17.6152	13.7066	27.8665	20.816	7.90758	20.8308	11.8182	13.7269	139.483	92.6953	323.483	215.856	367.106	146.748	61.8117	33.9311	497.049	568.159	609.123
HIPPOLYTE_1-2-3_TRINITY_DN227724_c2_g3	7.72551	0	1.21677	7.89348	7.04807	15.578	8.97962	2.08593	11.3143	3.29703	0	3.01939	759.044	362.712	226.289	2970.42	579.052	942.492	300.576	264.166	352.515	1241.31	926.742	Arrestin homolog;
HIPPOLYTE_1-2-3_TRINITY_DN227734_c0_g1	0	0	0	0	0	0	0	0	0	0	0	0	726.523	1860.26	10963.3	3211.49	5658.33	2884.55	505.729	1124.3	4480.92	5881.02	283.68	U-scoloptoxin(01)-Er1a ;
HIPPOLYTE_1-2-3_TRINITY_DN227734_c0_g2	0	0	0	0	0	0	0	0	0	0	0	0	99.58	725.621	2187.28	996.698	880.819	813.379	201.474	265.902	942.006	869.224	52.3556
HIPPOLYTE_1-2-3_TRINITY_DN227738_c6_g3	24.032	17.4875	4.77695	18.4335	7.91664	9.63661	17.9627	14.6004	2.28372	14.37	25.94	14.8746	205.12	155.263	483.798	447.439	500.373	191.393	105.678	58.7672	683.026	800.43	770.988
HIPPOLYTE_1-2-3_TRINITY_DN228212_c7_g2	0	0	0	2.20597	0	0.546679	0	0	1.89677	0	0	0	64.5356	135.539	800.146	260.143	357.35	196.879	108.996	19	543.028	797.354	668.421
HIPPOLYTE_1-2-3_TRINITY_DN228448_c14_g1	2.60117	2.94002	0	1.17448	0	5.25919	3.55734	0	0	8.81751	7.39944	2.05056	2031.44	5565.02	45244.1	34021.5	30469.3	11270.6	4944.74	1956.18	73385.6	84527.5	65742.6	Transient-receptor-potential-like protein;
HIPPOLYTE_1-2-3_TRINITY_DN228448_c14_g2	0	0	0	0	0	0	0	0	0	0	0	0	21.4704	17.5195	390.87	208.506	295.332	44.4092	10.8812	6.48597	536.468	708.869	806.345
HIPPOLYTE_1-2-3_TRINITY_DN228448_c14_g3	0	0	0	0	0	0	0	0	0	0	0	0	9.65465	19.6535	301.341	135.608	183.829	46.8903	17.2321	9.41898	367.646	472.43	390.971
HIPPOLYTE_1-2-3_TRINITY_DN228448_c14_g4	2.88268	0	1.20615	1.31795	0	0	5.00704	1.04613	2.26794	0	1.17745	0	533.204	928.85	14787.7	8922.15	9752.1	2262.6	871.888	332.893	19825.8	25022.8	21984.8
HIPPOLYTE_1-2-3_TRINITY_DN228448_c14_g5	2.89889	3.28144	2.43625	1.31528	0	0	0	1.04256	1.1311	2.19703	0	3.02515	179.573	142.199	7161.05	3343.76	5244.54	529.769	141.296	101.234	10024.8	13954.3	12496.2
HIPPOLYTE_1-2-3_TRINITY_DN228448_c14_g6	0.94537	0	0	3.97795	1.76484	0	0	0	0	1.11539	0	0	281.383	394.268	10556.9	5248.63	7437.07	1097.71	378.913	121.324	12571	18193.6	17452.8
HIPPOLYTE_1-2-3_TRINITY_DN228481_c3_g1	20.881	7.78407	6.81339	14.6374	4.74746	3.44495	11.9892	5.91309	4.73946	4.92649	5.50088	10.33	269.512	151.964	370.941	352.479	439.541	178.828	138.599	104.776	300.39	327.847	360.868	Glutamate-gated chloride channel;
HIPPOLYTE_1-2-3_TRINITY_DN228509_c1_g2	0	0	0	0	0.880681	0	0	0	0	0	0	0	56.7765	136.545	236.946	143.759	147.525	194.4	96.5627	46.0061	508.036	339.325	405.983
HIPPOLYTE_1-2-3_TRINITY_DN228772_c3_g2	9.45075	3.2384	1.17222	6.63094	4.41233	4.70145	2.02703	0	1.14151	10.0405	2.33803	14.14	352.147	147.061	696.529	532.479	661.644	182.007	168.513	108.972	605.554	658.299	855.212
HIPPOLYTE_1-2-3_TRINITY_DN228953_c4_g3	23.0458	22.8857	22.8905	7.90968	6.16971	5.78799	25.0471	16.7447	7.94029	5.51701	14.1251	2.96871	130.551	80.6835	384.959	344.734	468.246	144.91	77.0038	40.7195	446.854	647.388	581.498
HIPPOLYTE_1-2-3_TRINITY_DN229289_c5_g1	0	0	0	0	0	0	0	0	0	0	0	1.49441	12.1737	87.8006	198.281	160.228	220.763	130.631	83.6007	36.5744	347.383	336.369	456.164	Transient receptor potential protein;
HIPPOLYTE_1-2-3_TRINITY_DN229289_c5_g2	0	1.09481	4.88605	0	0.880849	1.95431	0	1.04155	0	1.09728	0	6.0792	51.2839	237.616	756.571	681.611	794.514	445.847	238.468	104.326	1475.09	1509.83	1711.22	Transient-receptor-potential-like protein;
HIPPOLYTE_1-2-3_TRINITY_DN229308_c3_g1	0	0	0	1.37464	0.921156	1.8979	0	2.17835	0	10.327	1.23531	5.9062	121.382	350.236	1919.08	1340.76	2097.16	616.054	293.894	124.6	2963.8	3169.13	3926.74	Transient receptor potential protein;
HIPPOLYTE_1-2-3_TRINITY_DN229308_c3_g3	0	0	0	0	0	0	0	0	0	0.73355	0.777349	0	7.49146	17.1424	361.751	145.994	389.94	47.1173	51.8379	12.4646	522.904	953.797	616.147
HIPPOLYTE_1-2-3_TRINITY_DN229635_c7_g1	0.967517	1.09461	0	15.776	4.40436	2.92995	8.967	0	0	0	0	1.51835	850.872	1001.73	8075.94	5473.45	6601.24	3132.7	971.417	1109.08	13439.7	23342.9	11758.4	Xylose isomerase;
HIPPOLYTE_1-2-3_TRINITY_DN229643_c6_g1	14.216	3.87772	3.8969	12.153	10.2011	3.4279	3.57096	13.3969	3.37584	2.30789	6.28379	12.062	78.5744	60.2349	243.882	221.297	255.527	95.5675	50.3305	37.0492	321.967	373.818	333.034
HIPPOLYTE_1-2-3_TRINITY_DN229650_c3_g2	0	1.23965	0	0	0	2.66176	0	0	0	3.02405	0	0.432724	154.78	353.41	1326.68	1268.7	1416.17	751.083	417.493	176.702	2729.43	3156.31	2787.2	Neither inactivation nor afterpotential protein C;
HIPPOLYTE_1-2-3_TRINITY_DN229664_c7_g2	10.4465	7.87615	14.2901	0	9.50161	6.73365	14.0407	10.643	6.09466	4.92989	18.4422	2.73741	82.1582	144.575	172.524	262.522	230.164	175.723	115.957	45.0506	402.213	394.137	338.066
HIPPOLYTE_1-2-3_TRINITY_DN229807_c3_g2	17.3306	16.3728	13.3145	7.90205	14.9806	4.84439	5.99963	9.40381	3.39893	8.81074	2.35699	0.748122	233.685	259.148	1095.77	1524.73	1410.71	395.641	201.229	83.6854	1257.14	1619.78	2533.4
HIPPOLYTE_1-2-3_TRINITY_DN229944_c2_g1	0	0	0	0	0	0	0	0	0	0	0	0.704743	177.363	140.932	1516.34	1748.52	3401.72	477.863	137.22	184.26	6475.22	10774.2	8539.78
HIPPOLYTE_1-2-3_TRINITY_DN229944_c2_g2	0	0	0	0	0	0	0	0	0	0	0	0	19.2299	25.5975	265.571	269.423	371.301	96.976	40.7463	38.1942	1037.65	1328.2	1049.75
HIPPOLYTE_1-2-3_TRINITY_DN229944_c2_g3	0	1.09549	2.44771	0	0	0	0.995296	0	0	2.19285	0	0.762405	91.1919	42.8465	610.039	584.659	982.444	158.499	21.2321	50.9007	1993.26	4972.32	3171.89
HIPPOLYTE_1-2-3_TRINITY_DN229944_c2_g4	0	0	0	0	0	0	0	0	0	0	0	0	97.1288	100.151	748.448	1085.72	1650.63	294.883	75.5001	79.9936	3912.18	6311.83	4811.42
HIPPOLYTE_1-2-3_TRINITY_DN229944_c2_g5	0	0	0	0	0	0	0	0	0	0	0	0	13.797	7.69883	246.029	250.957	532.115	30.7421	12.3013	24.6072	1039.32	1765.14	1177.77
HIPPOLYTE_1-2-3_TRINITY_DN230266_c5_g2	0.969548	0	0	2.62728	0	0	5.96865	0	0	0	0	0	402.619	647.465	1624.48	3473.23	1804.81	1310.88	549.975	169.562	3114.83	3093.25	3436.12
HIPPOLYTE_1-2-3_TRINITY_DN230401_c1_g1	0	0	0	0	0	0	0	0	0	0	0	0	81.5148	91.0373	212.586	99.702	135.319	69.0793	76.44	83.1493	428.438	794.488	438.917
HIPPOLYTE_1-2-3_TRINITY_DN230401_c2_g1	0	0	0	0	0	0	0	0	0	0	0	0	55.8231	52.5584	203.886	140.962	195.743	54.6575	45.0794	44.4752	529.315	880.286	561.921
HIPPOLYTE_1-2-3_TRINITY_DN230401_c2_g2	0	0	0	0	0	0	0	0	0	0	0	0	142.598	168.276	252.368	231.343	154.67	115.005	132.912	137.366	676.533	936.984	535.357
HIPPOLYTE_1-2-3_TRINITY_DN230401_c2_g3	0	0	0	0	0	0	0	0	0	0	0	0	98.4957	169.753	400.075	233.363	209.527	113.41	134.482	139.215	792.682	1110.5	775.718
HIPPOLYTE_1-2-3_TRINITY_DN230401_c2_g4	0	0	0	0	1.78911	0	0	0	0	0	0	0	348.371	432.863	1266.35	836.165	938.99	327.722	309.973	357.348	3168.85	4366.6	3186.07
HIPPOLYTE_1-2-3_TRINITY_DN230401_c2_g6	0	0	0	0	0	0	0	0	0	0	0	0	176.712	224.492	642.21	430.688	412.372	144.36	181.635	194.06	1443.21	2144.09	1528.72
HIPPOLYTE_1-2-3_TRINITY_DN230475_c2_g1	0	0	0	0	0	0	0	0	0	0	0	0	11.1385	71.1633	598.869	343.107	421.358	50.3887	38.7109	11.0448	678.824	887.927	841.705	Arrestin, lateral eye;
HIPPOLYTE_1-2-3_TRINITY_DN230475_c2_g2	0	0	0	0	0.917403	0	0	0	0	0	0	0	46.8492	158.744	922.811	499.214	693.77	102.54	57.3914	16.6257	1005.93	1357.13	1302.16	Arrestin homolog;
HIPPOLYTE_1-2-3_TRINITY_DN230475_c2_g3	0	0	0	0	0	0	0	0	0	0	0	0	8.68322	32.167	542.907	273.523	362.543	26.4933	20.097	8.27348	540.203	937.323	980.352	Arrestin homolog;
HIPPOLYTE_1-2-3_TRINITY_DN230475_c5_g1	0	0	0	0	0	0.828658	0	0	0	0	0	0	14.1057	55.267	1381.73	686.337	805.349	51.9671	28.8922	11.6883	1252.89	1933.34	1894.67	Arrestin homolog;
HIPPOLYTE_1-2-3_TRINITY_DN230475_c5_g2	0.959074	0	0	6.59422	0	0.962761	1.00277	1.0473	0	4.41748	2.35296	0.739499	349.454	1043.43	21353.7	10444.7	16132.2	1110.82	557.001	222.565	26604.9	39472	31959
HIPPOLYTE_1-2-3_TRINITY_DN230475_c5_g3	0	0	0	0	1.78601	0	0	0	0	0	0	0	55.0973	316.186	3232.8	1756.38	2259.64	270.894	142.424	63.9306	3587.59	4923.61	4074	Arrestin, lateral eye;
HIPPOLYTE_1-2-3_TRINITY_DN230475_c5_g5	0	0	0	0	0	0.838724	0	0	0	0	0	1.78088	28.0391	98.9021	1565.05	705.741	1115.76	74.7274	47.4814	24.9252	1558.1	2454.83	1916.88	Arrestin homolog;
HIPPOLYTE_1-2-3_TRINITY_DN230475_c5_g6	0	0	0	0	0	0	0	0	0	0	0	0	8.09764	55.8139	384.39	172.33	232.064	34.3046	18.857	10.8308	341.975	591.49	650.9	Phosrestin-1;
HIPPOLYTE_1-2-3_TRINITY_DN230475_c7_g1	0	0	0	2.65568	3.5313	0.93594	0	1.05838	0	2.23564	0	2.10166	173.25	763.906	14142.3	7383.4	11125.2	800.387	405.33	163.857	17311.6	23459.8	20003.7	Arrestin homolog;
